1        **Doubled haploid based parental lines are most suitable in predicting heterosis using**  
2        **microsatellites and in development of highly heterotic F<sub>1</sub> hybrids in *Brassica oleracea***

3        **Short title: Microsatellite based prediction of heterosis using doubled haploids parental**  
4        **lines**

5  
6        **Saurabh Singh<sup>1</sup>, S.S. Dey<sup>1\*</sup>, Reeta Bhatia<sup>2</sup>, Raj Kumar<sup>1</sup>, Kanika Sharma<sup>3</sup>, T.K. Behera<sup>1</sup>**

7        <sup>1</sup>Division of Vegetable Science, ICAR-Indian Agricultural Research Institute, New Delhi, India-  
8        110012

9        <sup>2</sup>Division of Floriculture and Landscaping, ICAR-Indian Agricultural Research Institute, New  
10        Delhi, India-110012

11        <sup>3</sup>ICAR-Indian Agricultural Research Institute, Regional Station, Katrain, Kullu, Himachal  
12        Pradesh, India-175129

13        \*Email: shyam.iari@gmail.com (SSD)

14        \*horticulturesaurabh@gmail.com (SS)

15        ORCID iD: <http://orcid.org/0000-0001-9211-8820> (SSD)

16        ORCID iD: <http://orcid.org/0000-0001-8038-1808> (SS)

17

18

19

20

21

22

## 23 Abstract

24 In *Brassica oleracea*, heterosis is one of the most efficient tools giving impetus to hybrid  
25 vegetable industry. In this context, we presented the first report on identifying superior heterotic  
26 crosses for yield and commercial traits in cauliflower involving cytoplasmic male sterile (CMS)  
27 and doubled haploid (DH) lines as parents. We studied the suitability of SSR and EST-SSRs  
28 based genetic distance (GD) and morphological markers based phenotypic distance (PD) in  
29 prediction of heterosis when DH based genotypes are used as parents in developing F<sub>1</sub> hybrids.  
30 Overall 120 F<sub>1</sub> hybrids derived from twenty *Ogura* cybrid CMS lines and six DH based testers  
31 were evaluated for 16 phenotypic traits along with their 26 parental lines and 4 commercial  
32 standard checks, in 10 × 15 alpha lattice design. The genomic SSR and EST-SSRs based genetic  
33 structure analysis grouped 26 parental lines into 4 distinct clusters. The CMS lines Ogu118-6A,  
34 Ogu33A, Ogu34-1A were good general combiner for developing short duration hybrids. The  
35 SCA effects were significantly associated with heterosis suggesting non-additive gene effects for  
36 heterotic response of hybrids. Less than unity value of  $\sigma^2A/D$  coupled with  $\sigma^2_{gca}/\sigma^2_{sca}$  indicated  
37 the predominance of non-additive gene action in the expression of studied traits. The genetic  
38 distance estimates among 26 parents ranged from 0.44 to 0.98 and were significantly associated  
39 with heterosis for important commercial traits, suggesting the utility of microsatellite based  
40 genetic distance in prediction of heterosis in *B. oleracea*.

41

42

43

44

## 45 **Introduction**

46 In the plant kingdom, the family *Brassicaceae* holds a great agronomic, scientific and  
47 economically important position and comprises more than 372 genera and 4060 species [2]. Of  
48 the diverse species, *Brassica oleracea* (CC,  $2n = 18$ ) constitutes well defined group of  
49 economically and nutritionally important morphotypes, referred to as cole vegetables (kale,  
50 kohlrabi, cabbage, cauliflower, broccoli, brussels sprout) [52]. These *Brassica* vegetables are  
51 also termed as ‘super-food’ as they are vital source of secondary metabolites, antioxidants,  
52 vitamins and minerals [71, 16, 64, 69]. Among the cultivated *B. oleracea* varieties, cauliflower  
53 (*B. oleracea* var. *botrytis* L.) is an important vegetable crop grown worldwide. Great efforts have  
54 been made to improve the productivity and quality of this crop, ascribed to its economic value  
55 and as an essential component of healthy diet [91]. The replacement of open pollinated varieties  
56 with  $F_1$  hybrids have become much pronounced in cole vegetables including cauliflower due to  
57 high uniformity, better quality, tolerance to various biotic stresses and vagaries of adverse  
58 climatic conditions [17, 69]. It is well established that *Brassica* vegetables exhibit a wide range  
59 of heterosis and high heterosis have been reported in cauliflower also for both yield and quality  
60 traits [13, 15, 69]. Nature has bestowed *Brassica* vegetables with genetic mechanisms of  
61 sporophytic self-incompatibility (SI) and cytoplasmic male-sterility (CMS), which have  
62 efficiently triggered the hybrid breeding programme in these crops [13, 15, 17, 66, 69, 77].  
63 However, in the current scenario of increasing temperature as a result of global warming there is  
64 frequent breakdown of self-incompatibility, as S-alleles are more prone to high temperature.  
65 Thus, SI lines are not always stable and results in sibbed seed in hybrid breeding [66]. In  
66 addition, the maintenance of S-allele lines is time consuming and costly endeavor and in case of

67 snowball cauliflower, SI system is very poor or absent [66, 68]. Under these circumstances, the  
68 genetic system of CMS provides a better alternative for heterosis breeding in cole crops [17, 69].  
69 Heterosis or hybrid vigor, plausibly results from accumulation of parental genetic and epigenetic  
70 information, is manifested as superior performance of hybrid offspring relative to the average of  
71 their genetically diverse parents [3, 26, 45]. Despite its tremendous economic value in hybrid  
72 breeding, the molecular basis behind this biological phenomenon is still obscure [3, 49, 26, 31,  
73 48]. So far, different hypothesis and genetic mechanisms have been put forward to elucidate this  
74 complex phenomenon such as dominance model, over-dominance model and epistasis model [3,  
75 49, 26, 31, 48]. Recent progress in QTL analysis, transcriptomics, proteomics, metabolomics  
76 have helped in elucidation of heterosis at molecular level to some extent by explaining the role of  
77 epigenetic regulations such as DNA methylation, small RNAs (sRNAs) and histone  
78 modifications in hybrid vigour in different crop plants [26, 31, 45, 48]. Preselecting inbred  
79 parents and recognizing most promising heterotic combinations is crucial for accelerating  
80 heterosis breeding in crop plants. The measure of both general combining ability (GCA), which  
81 provides information on breeding value of parents as well as about the additive genetic control,  
82 and specific combining ability (SCA) is necessary for selection of parental lines and heterotic  
83 groups [38]. The estimation of SCA is associated with non-additive effects (dominance effects,  
84 additive $\times$ dominant and dominant $\times$ dominant interactions). Among different biometrical  
85 approaches, line  $\times$  tester analysis appears to be ideal for estimating GCA effects of lines and  
86 testers, SCA effects of cross combinations, and providing information about nature of gene  
87 actions [17, 20, 41]. The extent of heterosis has been reported to be vary with mode of  
88 reproduction, genetic distance of parents, traits under investigation, developmental stage of plant  
89 and prevailing environment [27, 34, 38, 40, 44, 73]. The pair-wise parental genetic distance (GD)

90 has been suggested as a good indicator of *per se* hybrid performance and recognition of heterotic  
91 groups [27, 34, 38, 40, 44, 73]. Different approaches are available to determine genetic distance  
92 depending upon morphological traits, horticultural data, biochemical characteristics and DNA  
93 markers based genotypic data [33, 55]. Molecular markers have been well established as a  
94 powerful tool for analyzing genetic diversity and estimation of genetic distances among different  
95 genotypes or advance breeding populations. SSR (simple sequence repeat) markers have been  
96 markers of choice owing to their co-dominant inheritance, whole-genome coverage, abundance  
97 and high reproducibility [40, 76]. However, so far, contradictory results have been reported with  
98 respect to relationship between GD and heterosis across different crops (3, 20, 27, 33, 34, 36, 40,  
99 44, 73, 78]. These results suggest that the heterosis for yield and yield related traits is highly  
100 complex phenomenon. As suggested by Cress [12] that for significant heterosis the extent of  
101 parental GD is essential but is not enough to assure it and in addition, the better forecasting of  
102 heterosis is possible only when GD is lesser than a definite threshold level [4]. Furthermore, the  
103 association of GD and heterosis also depends upon the germplasm, population under  
104 investigation, methods of calculating GD [73-74]. The parents with small GD can also display  
105 high level of heterosis like closely related ecotypes in *Arabidopsis* resulted hybrids with  
106 significant improvement in plant biomass and seed yield [26, 32]. Contrasting results are also  
107 available about association of genetic distance based on morphological traits (hereafter referred  
108 as PD: phenotypic distance) and mid-parent heterosis (MPH) and SCA in various crop plants  
109 [33, 78, 79, 86]. Teklewold and Becker [79] reported significantly positive association of PD  
110 with MPH, GCA and hybrid performance for seed yield in Ethiopian mustard (*Brassica*  
111 *carinata*), while Hale et al. [34] found no correlation of PD with heterosis in broccoli.

112 The development of homozygous inbred lines is tedious and time consuming process in *B.*  
113 *oleracea* crops due to their allogamous nature, on account of genetic mechanisms of protogyny  
114 and self-incompatibility [9] leading to high inbreeding depression. In the heterosis breeding  
115 programmes, the inbred development is prerequisite for successful hybrid development  
116 programmes and for different genetic studies. The availability of doubled haploid (DH)  
117 technology eliminates the long time requirement for inbred generation through traditional 5-7  
118 generations of selfing. The DH technology in *B. oleracea* crops through isolated microspore  
119 culture (IMC) has accelerated the breeding programmes through generation of homozygous DH  
120 lines in two-successive generations [9, 25]. The DH induction has significantly enhanced the  
121 genetic and genomic research in *Brassica* vegetables. The DH based breeding populations have  
122 been instrumental in discovery and mapping of QTLs of economically important agronomic and  
123 quality traits in *Brassica* vegetables [35, 51, 72, 89]. DH based populations has also facilitated  
124 the construction of high-density genetic linkage map [90], mapping QTLs/genes for disease  
125 resistance [50, 70], identification of QTLs related to timing of curd induction, subtropical  
126 adaptation in *Brassica oleracea* crops [35, 46, 62]. Thus, realizing the utility of DH technology  
127 in accelerating the genetic improvement of *B. oleracea* crops, completely homozygous DH lines  
128 have been developed by our group previously through IMC in cauliflower [7-9]. Concurrently,  
129 advance generation *Ogura* CMS lines in cauliflower for heterosis breeding have also been  
130 developed by protoplast fusion followed by recurrent backcrossing in the nuclear background of  
131 elite genotypes [6, 13].

132 To the best of authors' knowledge, rare or inadequate information is available regarding  
133 combining ability, gene action and heterosis breeding in cauliflower particularly using CMS and  
134 DH system for yield and agro-morphological traits. Recently, we have reported heterotic

135 responses by combining ability analysis utilizing this combination of CMS and DH system for  
136 antioxidant capacity and quality traits in cauliflower [69]. Then, to our knowledge we have not  
137 found any study in this particular crop (*B. oleracea* var. *botrytis* L.) about association of  
138 molecular GD and morphological PD with MPH, heter-parent heterosis (BPH) and SCA for yield  
139 and commercial traits. Thus, if genetic distance is significantly correlated with heterosis for  
140 commercial traits in cauliflower, the parental selection could be done based on genetic distance  
141 instead of field trials. Although, contrasting results have been obtained in different crops in this  
142 context, as heterosis is complex biological phenomenon with numerous genes numerous genetic  
143 mechanisms [26, 31, 45, 48]. Hence, in the present investigation, the main objectives were to (i)  
144 identify heterotic groups of CMS and DH lines for hybrid breeding on the basis of GCA, SCA  
145 effects, nature of gene action and heritability in cauliflower (ii) to find out is there any  
146 correlation of SSRs, EST-SSRs (expressed sequence tag based-SSRs) based GD and  
147 morphological traits based PD with heterosis and SCA (iii) to investigate the association of SCA  
148 with MPH, BPH and also to study the SSR and EST-SSRs based population structure of parental  
149 lines and testers used in the study. Present investigation is the first report of heterosis and  
150 combining ability based on CMS and DH technique in cauliflower to examine the prospects of  
151 developing  $F_1$  hybrids with respect to yield and commercial traits and to assess the role of  
152 genetic distances in prediction of heterosis in cauliflower.

## 153 **Materials and methods**

### 154 **Plant materials, experimental site, mating and experimental design**

155 The field experiment was carried out at Baragram Experimental Farm of ICAR-Indian  
156 Agricultural Research Institute (IARI), Regional Station, Katrain, Kullu Valley, Himachal  
157 Pradesh, India. The experimental farm is located at 32.12N latitude and 77.13E longitudes with

158 an altitude of 1,560 m above mean sea level. The basic genetic plant material for the present  
159 investigation comprised of 20 genetically diverse *Ogura* cybrid cytoplasm based elite CMS lines  
160 previously developed after more than nine generations of backcrossing having desirable  
161 agronomic and floral traits (Table 1). These CMS lines were used as female parent in the  
162 breeding programme. The completely homozygous 6 DH inbred lines of snowball cauliflower  
163 with abundant pollen production, developed through IMC, were used as testers (Table 1).  
164 The CMS and DH lines were selected among the 60 CMS and 24 DH lines developed  
165 previously, based on molecular, morphological characterization (data not shown in this  
166 publication) and flowering synchronization of lines and testers was also the main consideration  
167 in selection of parents. All the recommended package of practices, suggested for raising  
168 cauliflower crop at IARI- regional station Baragram farm, were followed to grow a healthy crop  
169 for displaying better agronomic and phenotypic expression [67]. The size of plot was kept 3.0 x  
170 3.0 m<sup>2</sup> with inter-and intra-row spacing of 45 cm. Then following the line x tester mating design  
171 [41], 20 CMS lines of cauliflower were crossed with 6 DH male fertile testers at flowering to  
172 generate 120 test cross progenies. To avoid any natural pollination, CMS lines were grown under  
173 muslin cloth cage. To pollinate fully opened flowers of CMS lines, fresh pollen from DH testers  
174 grown under net house was collected. Each CMS line was pollinated with all six DH testers for  
175 the hybrid seed production. Then, healthy seedlings of all the 120 F<sub>1</sub> hybrids and their 26  
176 parental lines (20 CMS + 6 DH) along with 4 commercial CMS based hybrids (HVCF-18,  
177 HVCF-29, HVCF-16 from Acsen HyVeg and Pahuja from Pahuja Seeds) as standard checks,  
178 were transplanted at the Baragram Experimental Farm of IARI to evaluate them for  
179 morphological, horticultural and yield related traits. All the 120 testcross progenies along with  
180 their parents and commercial checks were evaluated in 10×15 alpha lattice experimental design



181 **Table 1. Parental lines (cytoplasmic male-sterile) and testers (doubled haploid) used in the**  
 182 **study**

| <b>Code</b> | <b>Line</b> | <b>Curd Color</b> | <b>Curd compactness</b> | <b>Curd covering by inner leaves</b> | <b>Riceyness</b> | <b>Anthocyanin pigmentation</b> |
|-------------|-------------|-------------------|-------------------------|--------------------------------------|------------------|---------------------------------|
| L1          | Ogu122-5A   | White             | Compact                 | PC                                   | Absent           | Absent                          |
| L2          | Ogu115-33A  | White             | Compact                 | PC                                   | Absent           | Absent                          |
| L3          | Ogu118-6A   | White             | Compact                 | PC                                   | Absent           | Absent                          |
| L4          | Ogu307-33A  | Creamy White      | Compact                 | NC                                   | Absent           | Absent                          |
| L5          | Ogu309-2A   | Creamy White      | Compact                 | PC                                   | Absent           | Absent                          |
| L6          | Ogu33A      | White             | Compact                 | FC                                   | Absent           | Absent                          |
| L7          | OguKt-2-6A  | White             | Compact                 | PC                                   | Absent           | Absent                          |
| L8          | Ogu1A       | White             | Compact                 | PC                                   | Absent           | Absent                          |
| L9          | Ogu13-85-6A | White             | Compact                 | NC                                   | Absent           | Absent                          |
| L10         | Ogu1-6A     | White             | Compact                 | PC                                   | Absent           | Absent                          |
| L11         | Ogu2A       | White             | Compact                 | PC                                   | Absent           | Absent                          |
| L12         | OguKt-9-2A  | White             | Compact                 | PC                                   | Absent           | Absent                          |
| L13         | Ogu22-1A    | Creamy White      | Compact                 | PC                                   | Absent           | Absent                          |
| L14         | Ogu122-1A   | White             | Compact                 | PC                                   | Absent           | Absent                          |
| L15         | Ogu126-1A   | White             | Compact                 | PC                                   | Absent           | Absent                          |
| L16         | Ogu12A      | White             | Compact                 | PC                                   | Absent           | Absent                          |
| L17         | Ogu119-1A   | Creamy White      | Compact                 | PC                                   | Absent           | Absent                          |
| L18         | Ogu34-1A    | White             | Compact                 | PC                                   | Absent           | Absent                          |
| L19         | Ogu125-8A   | White             | Compact                 | FC                                   | Absent           | Absent                          |
| L20         | Ogu33-1A    | Creamy White      | Compact                 | PC                                   | Absent           | Absent                          |
| T1          | *DH-18-8-1  | White             | Compact                 | PC                                   | Absent           | Absent                          |
| T2          | *DH-18-8-3  | White             | Compact                 | PC                                   | Absent           | Absent                          |
| T3          | *DH-53-1    | White             | Compact                 | FC                                   | Absent           | Absent                          |
| T4          | *DH-53-6    | White             | Compact                 | FC                                   | Absent           | Absent                          |
| T5          | *DH-53-9    | White             | Compact                 | PC                                   | Absent           | Absent                          |
| T6          | *DH-53-10   | White             | Compact                 | PC                                   | Absent           | Absent                          |

183 \*All the DH lines used as testers were developed through isolated microspore culture (IMC) and  
 184 assessment of their ploidy level through flow cytometry analysis; L: lines, T: testers, PC: partly  
 185 covered, FC: fully covered, NC: not covered  
 186  
 187 with three replications. For data recording of agronomic traits, five randomly selected well  
 188 established plants were tag-labelled in each plot/block/replication.

## 189 **Morphological and agronomical characterization**

190 The 20 *Ogura* CMS lines, 6 DH testers along with their 120 test cross progenies were evaluated  
191 for sixteen agro-morphological traits viz. (i) days to 50% curd initiation: Days to 50% CI (ii)  
192 days to 50% curd maturity: Days to 50% CM (iii) plant height: PH (cm) (PH) (iv) gross plant  
193 weight: GPW (g) (v) marketable curd weight: MCW (g) (vi) net curd weight: NCW (g) (vii) leaf  
194 length: LL (cm) (viii) leaf width: LW (cm) (ix) number of leaves: NoL (x) curd length: CL (cm)  
195 (xi) curd diameter: CD (cm) (xii) core length: CoL (cm) (xiii) curd size index: CSI (cm<sup>2</sup>) (xiv)  
196 leaf size index: LSI (cm<sup>2</sup>) (xv) harvest index: HI (%) (xvi) Total marketable yield: TMY (t/ha)  
197 [13-15, 17]. Data were recorded from 5 randomly selected plants of each genotype of each  
198 plot/block of all the three replications.

## 199 **Statistical analysis for agronomic traits**

200 The agronomic data recorded for each parent, 120 F<sub>1</sub> hybrids and 4 commercial checks in alpha  
201 lattice design were subjected to analysis of variance (ANOVA) using GLM procedure of SAS  
202 (statistical analysis system) software version 9.4 [65]. The line × tester statistical analysis of  
203 GCA, SCA, heterosis, heritability, variance and mean performance for was accomplished as per  
204 Kempthorne [41] through SAS version 9.4. The testing of significance of GCA and SCA effects  
205 was done at 5%, 1%, and 0.1% probability through F test. Heterosis estimates for different traits  
206 were computed as per Xie et al. [85] based on formulae viz, MPH% (Mid parent heterosis) =  
207 [(F<sub>1</sub>-MP)/MP] × 100, BPH% (Better parent heterosis) = [(F<sub>1</sub>-BP)/BP] × 100, where MP is mid-  
208 parent and BP is better-parent performance and testing of significance was done at probability of  
209 p < 0.05, p < 0.01 and p < 0.01 through F test. The narrow-sense heritability (h<sup>2</sup><sub>ns</sub> = V<sub>A</sub>/V<sub>P</sub>; V<sub>P</sub> =  
210 V<sub>G</sub> + V<sub>E</sub>) estimates were categorized into three classes viz., high (> 30%), medium (10-30%) and  
211 low (< 10%) [61]. The GA was calculated as = H<sup>2</sup><sub>b</sub> × phenotypic standard deviation × K, where

212 K value is 2.06, which is standardized selection differential constant at 5% selection intensity  
213 [37]. The parental lines and testers were clustered into different groups based on sixteen  
214 agronomic traits using R software [63]. They were grouped through principal component  
215 analysis (PCA) to estimate the explained variance in first two axes. Pooled data from five  
216 randomly selected plants of each genotype per plot per block per replication for all the sixteen  
217 morphological and commercial traits were taken for statistical analysis.

## 218 **DNA extraction, PCR amplification**

219 All the parental CMS lines and DH testers were grown in pro-trays under glass house conditions  
220 in a soilless mixture of cocopeat, perlite and vermiculite in the ratio of 3:1:1. Genomic DNA  
221 extraction and purification was done from 100 mg fresh green young expanding leaves of 25-30  
222 days old seedlings using cetyltrimethyl ammonium bromide (CTAB) method with slight  
223 modifications [57]. Genomic DNA samples were adjusted to 25-50 ng DNA/ $\mu$ l and also stored at  
224 -80 °C as safeguard for further requirement. For the genotyping purpose, the pair of 350  
225 microsatellite primers comprising genomic-SSRs and EST-SSRs distributed throughout the  
226 *Brassica oleracea* genome [47, 82] was used for genetic diversity analysis in parental CMS and  
227 DH lines of cauliflower. Among these 145 microsatellite primers were found to be polymorphic  
228 and of which 87 SSRs and EST-SSRs displaying clear amplification and polymorphism were  
229 used for final molecular analysis of 26 CMS and DH lines. Eppendorf Mastercycler Nexus  
230 GSX1 was used for PCR amplification in a reaction volume of 25  $\mu$ l. The PCR reaction mixture  
231 comprised of 1  $\mu$ l of each forward and reverse primers, 2  $\mu$ l of genomic DNA template (50 ng),  
232 12.50  $\mu$ l of 2 $\times$  PCR Green master mix (GoTaq DNA polymerase; Promega, USA) and 8.50  $\mu$ l  
233 nuclease free water. The PCR cycling programme was set up as follow: an initial denaturation of  
234 94 °C for 4 min followed by 35 cycles of denaturation at 94 °C for 30s, annealing of primers at

235 50 to 60 °C for 30s depending upon appropriate primer annealing temperatures and extension at  
236 72 °C for 1min, then final extension of 72 °C for 7min. Amplified PCR products were separated  
237 by 3.0% agarose gel electrophoresis in 1X TBE buffer (pH 8.0) and gel was run at 100 mA  
238 voltage for 120 min. Ethidium bromide (EtBr) of 0.5 mg/ml was used for gel staining and gel  
239 pictures were captured using one digital gel documentation unit (BioSpectrum® Imaging  
240 System™, UK). The determination of fragment sizes were done using Promega™ 50 bp DNA  
241 step ladder.

## 242 **Molecular analysis and genetic structure analysis**

243 Among 350 microsatellite markers, the 87 polymorphic genomic-SSR and EST-SSRs loci  
244 depicting genetic diversity (S1 Table) were used for cluster analysis, dendrogram construction  
245 based on simple matching (SM) coefficient with the PCA and neighbor joining (NJ) UPGMA  
246 method using DARwin software version 6.0.017 [59]. For testing the reliability of NJ  
247 dendrogram, a bootstrap value of 1000 replicates was used. For the allelic diversity analysis  
248 estimating observed number of alleles (N) per loci, observed heterozygosity ( $H_o$ ), expected  
249 heterozygosity ( $H_e$ ) and polymorphism information content (PIC) were computed through  
250 software CERVUS version 3.0 [39]. The estimation of PIC for each locus using CERVUS 3.0  
251 was calculated according to formula;  $PIC = 1 - \sum P_i^2$ , where  $P_i$  represents the  $i$ th allele frequency  
252 in a locus for the genotypes  $P$  under study [53].

253 The genetic structure analysis of parental population of testcross progenies was studied with  
254 Bayesian model-based clustering approach implemented in STRUCTURE version 2.3.4 software  
255 [60] to assign individuals to  $k$  clusters and sub-clusters. For the estimation of proportion of  
256 ancestral contribution in each parental line, all simulations were performed by parameter setting  
257 as: “admixture model” with “correlated allele frequencies”. The algorithm was implemented with

258 10,000 length of burn-in period followed by 100000 Markov Chain Monte Carlo (MCMC)  
259 repetitions and plausible range of putative k values was kept from  $k = 1$  to  $k = 10$  run  
260 independently with 15 iterations for each k. The optimum value of k for determining most likely  
261 number of subpopulations was predicted according to simulation method of DeltaK ( $\Delta K$ ) [21]  
262 with the help of web-based STRUCTURE HARVESTER version v0.6.94 [18].

## 263 **Correlation among genetic distances, heterosis, combining ability**

264 The Euclidean distance (ED), hereafter referred as phenotypic distance (PD) was calculated  
265 based on sixteen agronomic traits (days to 50% CI, days to 50% CM, PH, GPW, MCW, NCW,  
266 LL, LW, NoL, CL, CD, CoL, CSI, LSI, HI, TMY) using R software [63]. The SM dissimilarity  
267 coefficient (hereafter referred as genetic distance: GD) was computed based on SSR and EST-  
268 SSRs data analysis using DARwin software version 6.0.017. The association among GD, PD,  
269 MPH, BPH, SCA was computed by Pearson's correlation coefficients ( $r$ ) (pearson product  
270 moment correlation coefficient: PPMCC) by using R software packages version 3.5.1 in Rstudio  
271 1.1.456 [63] and testing of significance at  $p < 0.05$  and  $p < 0.01$ . The corrplot displaying  
272 correlation among distances, heterosis and combining ability was demonstrated via Rcorrplot  
273 package in Rstudio [84].

## 274 **Results**

### 275 **Analysis of variance**

276 The mean square estimates for different vegetative and commercial traits in alpha lattice  
277 experimental design revealed significant differences among treatments for all the characters  
278 except CD, CoL and CSI at 0.01% probability (Table 2). Likewise, the significant block effects  
279 in each replication were found for all the studied traits except Days to 50% CI, CD, CoL and CSI

280 at the probability of 0.01% (Table 2). The coefficient of determination ( $R^2$ ) indicated high  
281 variability percentage (>70%) for all the traits except CL, CD, CoL and CSI in the  
282 response ascribed to given independent variables (Table 2). The higher  $R^2$  value also suggests a  
283 higher significance of model. The line  $\times$  tester analysis of variance (ANOVA) for combining  
284 ability revealed highly significant differences ( $P < 0.001$ ) among the treatments and parents for  
285 all the vegetative and commercial traits (Table 3) except for CL for which significant differences  
286 among parents were found at  $P < 0.05$ . The mean squares of lines were also found significant for  
287 all the traits at 0.1% except for CL for which significant level of probability was  $P < 0.05$ ; while  
288 the mean squares of testers were non-significant for CL except all other traits (Table 3). The  
289 significant differences were also found with respect to lines versus testers for all the traits except  
290 LW, CL, CD, CoL, CSI and HI, while the mean squares of parents versus crosses were  
291 significant for all the traits except NoL (Table 3). The variance analysis for combining ability  
292 also revealed highly significant differences among 120 testcross progenies for all the 16 traits at  
293 0.1% probability, while no significant differences were found among three replications for all the  
294 traits except LW, suggesting true presence of inherent variability among all the crosses (Table 3).  
295 The line  $\times$  tester interaction effects were also significant for all the 16 agronomic traits.

296 **Table 2. Estimates of Mean Squares and R<sup>2</sup> for vegetative and commercial traits in Alpha Lattice Design**

| Source of variation      | df  | Days to 50% CI | Days to 50% CM | PH (cm)    | GPW (g)       | MCW (g)       | NCW (g)       | LL (cm)    | LW (cm)   |
|--------------------------|-----|----------------|----------------|------------|---------------|---------------|---------------|------------|-----------|
| Rep                      | 2   | 39.30****      | 26.16          | 56.54      | 174280.9      | 43664.67      | 17457.74      | 0.79       | 4.81      |
| Rep (Blk) <sub>Adj</sub> | 27  | 2.25           | 108.25****     | 80.21****  | 472557.5****  | 141692.58**** | 36519.71****  | 121.47**** | 26.45**** |
| Trt                      | 149 | 5.79****       | 283.87****     | 173.73**** | 1031554.2**** | 243935.75**** | 100214.64**** | 160.75**** | 41.81**** |
| Error                    | 271 | 0.95           | 5.67           | 10.45      | 19291.1       | 10469.57      | 3294.65       | 4.63       | 2.81      |
| R <sup>2</sup>           |     | 0.79           | 0.96           | 0.91       | 0.96          | 0.93          | 0.94          | 0.95       | 0.91      |

297

298 **Table 2. Continue**

| Source of variation      | df  | NoL       | CL (cm)  | CD (cm) | CoL (cm) | CSI (cm <sup>2</sup> ) | LSI (cm <sup>2</sup> ) | HI %       | TMY (t/ha) |
|--------------------------|-----|-----------|----------|---------|----------|------------------------|------------------------|------------|------------|
| Rep                      | 2   | 26.35     | 1.49     | 101.59  | 5658.14  | 10777.72               | 6828.08                | 7.72967    | 69.86      |
| Rep (Blk) <sub>Adj</sub> | 27  | 11.76**** | 1.76**** | 41.71   | 938.56   | 4369.41                | 222739.95****          | 130.65**** | 226.71**** |
| Trt                      | 149 | 27.59**** | 2.15**** | 47.54   | 1419.06  | 5052.84                | 312809.74****          | 219.61**** | 390.29**** |
| Error                    | 271 | 3.97      | 0.62     | 43.15   | 1410.16  | 3930.53                | 8735.85                | 28.65      | 16.75      |
| R <sup>2</sup>           |     | 0.81      | 0.68     | 0.42    | 0.39     | 0.45                   | 0.95                   | 0.82       | 0.93       |

299

300 \*= significant at 5% probability, \*\*= significant at 1% probability, \*\*\*= significant at 0.1%, \*\*\*\*= significant at 0.01% probability through F test,  
 301 Rep = Replication, Blk = Block, Trt = Treatment, Rep (Blk)<sub>Adj</sub>= Rep (Blk) Adjustable Days to 50% CI= Days to 50% curd initiation, Days to  
 302 50%CM= Days to 50% curd maturity, PH= Plant height, GPW= Gross plant weight, MCW= marketable curd weight, NCW = net curd weight,  
 303 LL= leaf length, LW= leaf width, NoL= No of leaves, CL= curd length, CD= curd diameter, CoL= core length, CSI= curd size index, LSI= leaf  
 304 size index, HI= harvest index, TMY= total marketable yield, R<sup>2</sup>: coefficient of determination

305

306

307 **Table 3. Line x Tester Analysis of variance (ANOVA) for combining ability for yield and horticultural traits in cauliflower**

| Source of variation | df  | Days to 50% CI | Days to 50% CM | PH (cm)    | GPW (g)        | MCW (g)       | NCW (g)       | LL (cm)    | LW (cm)   |
|---------------------|-----|----------------|----------------|------------|----------------|---------------|---------------|------------|-----------|
| Replicates          | 2   | 0.25           | 0.83           | 8.75       | 23153.58       | 11384.77      | 2565.82       | 1.65       | 6.04*     |
| Treatments          | 145 | 6.08***        | 299.66***      | 176.18***  | 1095365.25***  | 266871.75***  | 106378.93***  | 175.89***  | 43.16***  |
| Parents             | 25  | 13.28***       | 563.97***      | 113.34***  | 403231.69***   | 157665.16***  | 56107.28***   | 106.85***  | 29.26***  |
| Parents (Line)      | 19  | 15.26***       | 598.47***      | 116.59***  | 324516.00***   | 129477.23***  | 47982.00***   | 104.48***  | 34.83***  |
| Parents (Testers)   | 5   | 7.26***        | 35.52***       | 32.52*     | 93011.02***    | 92945.55***   | 59482.50***   | 72.38***   | 13.26***  |
| Parents (L vs T)    | 1   | 5.75*          | 2550.53***     | 455.84***  | 3449932.75***  | 1016833.69*** | 193611.64***  | 324.21***  | 3.48      |
| Parents vs Crosses  | 1   | 29.58***       | 1020.72***     | 5878.71*** | 31342492.00*** | 4855010.50*** | 1962991.75*** | 2546.75*** | 330.86*** |
| Crosses             | 119 | 4.37***        | 238.08***      | 141.46***  | 986594.00***   | 251258.53***  | 101338.41***  | 170.48***  | 43.66***  |
| Line Effect         | 19  | 5.53           | 1054.16***     | 222.35*    | 1737689.88*    | 335689.69     | 114123.88     | 270.94*    | 86.83**   |
| Tester Effect       | 5   | 5.06           | 33.96          | 65.61      | 694204.25      | 153128.39     | 47422.77      | 180.44     | 49.83     |
| Line * Tester Eff.  | 95  | 4.10***        | 85.61***       | 129.27***  | 851763.75***   | 239537.05***  | 101618.98***  | 149.86***  | 34.71***  |
| Error               | 290 | 1.20           | 4.94           | 11.04      | 20306.63       | 10387.84      | 3296.66       | 4.67       | 1.96      |
| Total               | 437 | 2.82           | 102.71         | 65.82      | 377032.50      | 95495.77      | 37496.81      | 61.47      | 15.65     |

308  
309 **Table 3 continue**

| Source of variation | df  | NoL       | CL (cm)  | CD (cm)   | CoL (cm) | CSI (cm <sup>2</sup> ) | LSI (cm <sup>2</sup> ) | HI %       | TMY (t/ha) |
|---------------------|-----|-----------|----------|-----------|----------|------------------------|------------------------|------------|------------|
| Replicates          | 2   | 2.92      | 1.28     | 1.07      | 0.01     | 181.72                 | 3407.57                | 6.81       | 18.22      |
| Treatments          | 145 | 29.54***  | 2.35***  | 5.11***   | 1.23***  | 1325.33***             | 348863.53***           | 238.79***  | 426.99***  |
| Parents             | 25  | 38.75***  | 1.07*    | 3.70***   | 0.95***  | 736.22***              | 169525.92***           | 305.09***  | 252.26***  |
| Parents (Line)      | 19  | 40.96***  | 1.21*    | 4.14***   | 1.08***  | 820.98***              | 190813.19***           | 323.77***  | 207.16***  |
| Parents (Testers)   | 5   | 15.33***  | 0.78     | 2.77***   | 0.61***  | 561.34**               | 88306.48***            | 292.54***  | 148.71***  |
| Parents (L vs T)    | 1   | 113.78*** | 0.00     | 0.00      | 0.01     | 0.17                   | 171165.05***           | 12.92      | 1626.93*** |
| Parents vs Crosses  | 1   | 0.79      | 61.33*** | 168.99*** | 16.64*** | 43832.41***            | 3937259.75***          | 1887.12*** | 7768.02*** |
| Crosses             | 119 | 27.84***  | 2.12***  | 4.03***   | 1.16***  | 1091.89***             | 356384.91***           | 211.01***  | 402.01***  |
| Line Effect         | 19  | 33.27     | 2.20     | 3.84      | 1.39     | 1097.96                | 670563.13**            | 226.60     | 537.10     |
| Tester Effect       | 5   | 23.30     | 0.10     | 3.10      | 0.58     | 264.71                 | 413817.59              | 132.45     | 245.01     |
| Line * Tester Eff.  | 95  | 27.00***  | 2.21***  | 4.11***   | 1.15***  | 1134.21***             | 290526.47***           | 212.03***  | 383.26***  |
| Error               | 290 | 4.07      | 0.64     | 0.61      | 0.11     | 157.99                 | 8677.53                | 27.14      | 16.62      |
| Total               | 437 | 12.51     | 1.21     | 2.11      | 0.48     | 545.43                 | 121529.77              | 97.27      | 152.79     |

310 \*, \*\*, \*\*\*, \*\*\*\* significant at 5%, 1%, 0.1%, 0.01% probability respectively through F test,

311



## 313 **Gene action, genetic components of variance, heritability**

314 The estimation of genetic components of variance, nature of gene action, heritability, genetic  
315 advance and degree of dominance is presented in Table 4. The GCA variance ( $\sigma^2_{gca}$ ) for both  
316 lines and testers was found lower in contrast to SCA variance ( $\sigma^2_{sca}$ ) for all the vegetative and  
317 commercial yield related traits except for Days to 50% CM for which the  $\sigma^2_{gca}$  for lines was  
318 superior than both  $\sigma^2_{gca}$  for testers and  $\sigma^2_{sca}$ . Then, the value of dominance variance ( $\sigma^2D$ ) was  
319 greater as compared to additive component of variance ( $\sigma^2A$ ) for all the studied traits except for  
320 Days to 50% CM. The degree of dominance was observed greater than unity for all the studied  
321 traits indicating dominant nature of these traits except for Days to 50% CM, for which the value  
322 of degree of dominance was approaching to unity (0.99). Further, the ratio of additive to  
323 dominance variance ( $\sigma^2A/D$ ) coupled with predictability ratio ( $\sigma^2_{gca}/\sigma^2_{sca}$ ) was found less than  
324 unity for all the traits suggesting preponderance of non-additive gene action, except for Days to  
325 50% CM for which the value of  $\sigma^2A/D$  was slightly higher than unity (1.03). The estimation of  
326 heritability magnitude is associated with selection efficiency. In the present investigation, the  
327 lowest estimate of narrow-sense heritability ( $h^2_{ns}$ ) was found for CL (3.44%) and highest  $h^2_{ns}$   
328 value was recorded for Days to 50% CM (49.21%). Generally, moderate level of  $h^2_{ns}$  estimates  
329 was found for majority of the traits except for CL, CD, CSI and HI, for which low  $h^2_{ns}$  was  
330 observed. The higher estimates of genetic advance (GA) at 5% selection intensity were observed  
331 for GPW, MCW, NCW and LSI, while lower estimates of GA were recorded for all other traits.

## 332 **Combining ability effects**

333 The estimates of combining ability are effective for early generation selection of inbred lines and  
334 identifying heterotic crosses. The GCA estimates of parental lines and testers are summarized in  
335 Table 5. The GCA estimates revealed that the CMS lines Ogu118-6A, Ogu33A, Ogu34-1A

336

337 **Table 4. Estimates of genetic components of variance, heritability, genetic advance and predictability ratio for sixteen**  
 338 **vegetative and commercial traits**

| Variance components                | Days to 50% CI | Days to 50% CM | PH (cm) | GPW (g)   | MCW (g)  | NCW (g)  | LL (cm) | LW (cm) | NoL   | CL (cm) | CD (cm) | CoL (cm) | CSI (cm <sup>2</sup> ) | LSI (cm <sup>2</sup> ) | HI %  | TMY (t/ha) |
|------------------------------------|----------------|----------------|---------|-----------|----------|----------|---------|---------|-------|---------|---------|----------|------------------------|------------------------|-------|------------|
| $\sigma^2_{\text{gca line}}$       | 0.24           | 58.29          | 11.74   | 95410.18  | 18072.32 | 6157.07  | 14.79   | 4.71    | 1.62  | 0.09    | 0.18    | 0.07     | 52.22                  | 36771.42               | 11.08 | 28.92      |
| $\sigma^2_{\text{gca tester}}$     | 0.06           | 0.48           | 0.91    | 11231.63  | 2379.01  | 735.44   | 2.93    | 0.80    | 0.32  | -0.01   | 0.04    | 0.01     | 1.78                   | 6752.33                | 1.76  | 3.81       |
| s <sup>2</sup> GCA (Average)<br>HS | 0.10           | 13.82          | 3.41    | 30657.45  | 6000.54  | 1986.58  | 5.67    | 1.70    | 0.62  | 0.01    | 0.07    | 0.02     | 13.42                  | 13679.82               | 3.91  | 9.60       |
| $\sigma^2_{\text{sca}}$            | 0.97           | 26.89          | 39.41   | 277152.38 | 76383.07 | 32774.11 | 48.40   | 10.92   | 7.64  | 0.52    | 1.17    | 0.34     | 325.41                 | 93949.65               | 61.63 | 122.21     |
| $\sigma^2\text{A}$                 | 0.21           | 27.65          | 6.82    | 61314.89  | 12001.09 | 3973.16  | 11.33   | 3.40    | 1.24  | 0.03    | 0.15    | 0.04     | 26.84                  | 27359.63               | 7.81  | 19.20      |
| $\sigma^2\text{D}$                 | 0.97           | 26.89          | 39.41   | 277152.38 | 76383.07 | 32774.11 | 48.40   | 10.92   | 7.64  | 0.52    | 1.17    | 0.34     | 325.41                 | 93949.65               | 61.63 | 122.21     |
| $\sigma^2\text{A/D}$               | 0.22           | 1.03           | 0.17    | 0.22      | 0.16     | 0.12     | 0.23    | 0.31    | 0.16  | 0.05    | 0.13    | 0.13     | 0.08                   | 0.29                   | 0.13  | 0.16       |
| Degree of Dominance                | 2.15           | 0.99           | 2.40    | 2.13      | 2.52     | 2.87     | 2.07    | 1.79    | 2.48  | 4.46    | 2.82    | 2.78     | 3.48                   | 1.85                   | 2.81  | 2.52       |
| Heritability (Narrow Sense) %      | 13.31          | 49.21          | 13.66   | 17.76     | 13.07    | 10.50    | 18.49   | 22.73   | 12.13 | 3.44    | 9.67    | 10.48    | 6.63                   | 22.03                  | 9.96  | 13.07      |
| Genetic Advance 5%                 | 0.34           | 7.60           | 1.99    | 214.97    | 81.57    | 42.07    | 2.98    | 1.81    | 0.80  | 0.06    | 0.25    | 0.14     | 2.75                   | 159.92                 | 1.82  | 3.26       |
| Predictability Ratio               | 0.18           | 0.51           | 0.15    | 0.18      | 0.14     | 0.11     | 0.19    | 0.24    | 0.14  | 0.05    | 0.11    | 0.11     | 0.08                   | 0.23                   | 0.11  | 0.14       |

339

340  $\sigma^2\text{A}$  = additive genetic variance,  $\sigma^2\text{D}$  = dominance genetic variance,  $\sigma^2_{\text{gca}}$  = estimate of GCA variance,  $\sigma^2_{\text{sca}}$  = estimate of SCA  
 341 variance

342

343 and Ogu33-1A were having significantly high GCA in desirable direction with respect to traits  
344 related to earliness such as days to 50% CI and days to 50% CM (Table 5). Besides, the CMS  
345 lines Ogu307-33A, Ogu119-1A, Ogu125-8A and tester DH-53-10 also showed significantly high  
346 GCA for days to 50% CM in desirable direction (Table 5). The CMS line Ogu13-85-6A was  
347 found poor general combiner for all the traits except NCW, CoL and NoL. For the CoL, the  
348 significantly high GCA in desirable negative direction was observed in CMS lines Ogu122-5A,  
349 Ogu118-6A, Ogu1A, Ogu13-85-6A, Ogu1-6A, Ogu122-1A and tester DH-53-10 (Table 5). For  
350 the PH, GPW, MCW and NCW, significantly high GCA in desirable direction was observed in  
351 6, 9, 6 and 9 CMS lines, respectively. While among the six testers, only 2, 1, 2, 2 testers  
352 displayed significantly high GCA in desirable direction for these traits respectively. Among the  
353 20 CMS lines used as female parents, 8, 9, 6 and 8 lines showed significantly high GCA in  
354 desirable direction for LL, LW, NoL and LSI, respectively. For the curd traits like CL, CD and  
355 CSI, 2, 5, 5 CMS lines, respectively, were found good general combiner in positive direction,  
356 while 4 CMS lines for each of these traits significantly had negative GCA effects. None of the  
357 tester exhibited significant GCA for CL in any direction, while for CD, 1 tester had significantly  
358 high GCA in positive direction. For the HI, 7 CMS lines and 1 DH tester (DH-53-9) had  
359 significantly high GCA in positive direction. Among the 20 CMS lines, 6 lines (Ogu122-5A,  
360 Ogu33A, OguKt-2-6A, Ogu1-6A, Ogu126-1A and Ogu125-8A) had significantly high GCA for  
361 TMY in positive direction. While among the six testers, 2 testers, DH-53-1 and DH53-10  
362 exhibited significantly high GCA for TMY in positive direction (Table 5).

363 The results pertaining to SCA effects of 120 cross combinations are presented in supplementary  
364 S2 Table. Among the 120 hybrids, 9 and 28 crosses respectively, showed significantly negative  
365 SCA effects for earliness traits, days to 50% CI and days to 50% CM (S2 Table).

366 **Table 5. Estimates of general combining ability (GCA) effects of lines and testers**

| Lines/testers      | Days to 50% CI | Days to 50% CM | PH (cm)  | GPW (g)    | MCW (g)    | NCW (g)    | LL (cm)  | LW (cm)  |
|--------------------|----------------|----------------|----------|------------|------------|------------|----------|----------|
| Ogu122-5A          | 0.73**         | 6.78***        | -0.10    | 278.71***  | 213.54***  | 31.59*     | 0.14     | 1.06**   |
| Ogu115-33A         | 0.62*          | 5.56***        | -2.29**  | 330.54***  | 26.21      | 24.64      | 5.09***  | 1.59***  |
| Ogu118-6A          | -0.60*         | -7.99***       | 0.68     | 274.38***  | 23.93      | 148.70***  | 1.19*    | 2.26***  |
| Ogu307-33A         | -0.49          | -13.16***      | -0.03    | 209.32***  | 11.21      | -14.02     | 5.17***  | 2.61***  |
| Ogu309-2A          | 0.17           | 6.39***        | -5.51*** | -267.13*** | -5.07      | 77.64***   | -4.70*** | -1.80*** |
| Ogu33A             | -0.71**        | -13.27***      | 0.74     | 402.88***  | 179.27***  | 50.42***   | -1.23*   | -0.24    |
| OguKt-2-6A         | -0.16          | 4.84***        | 7.55***  | 609.65***  | 223.04***  | 77.20***   | 6.84***  | 5.56***  |
| Ogu1A              | -0.27          | 4.73***        | -2.50**  | 19.88      | 18.27      | -27.74*    | -0.79    | 0.39     |
| Ogu13-85-6A        | 0.06           | -0.77          | -3.32*** | 64.04      | -41.46     | 40.31**    | -6.09*** | -3.54*** |
| Ogu1-6A            | -0.44          | 5.95***        | -0.32    | -40.40     | 62.66**    | 66.81***   | -5.78*** | -2.02*** |
| Ogu2A              | 0.56*          | 4.51***        | -0.84    | -266.40*** | -159.57*** | -68.63***  | -2.00*** | -1.74*** |
| OguKt-9-2A         | 0.68**         | 8.34***        | 2.87***  | -282.07*** | -135.73*** | -56.63***  | -0.18    | 0.84*    |
| Ogu22-1A           | 0.12           | 2.95***        | 3.36***  | -109.96**  | -39.34     | -53.13***  | -2.38*** | -2.14*** |
| Ogu122-1A          | 0.56*          | 6.34***        | 3.31***  | -148.29*** | -105.84*** | -84.13***  | 4.09***  | -0.22    |
| Ogu126-1A          | 0.56*          | 4.01***        | 1.83*    | 76.99*     | 115.16***  | 67.81***   | 4.55***  | 0.65*    |
| Ogu12A             | 0.56*          | 6.89***        | -0.89    | -459.68*** | -131.51*** | -60.47***  | -3.57*** | -1.59*** |
| Ogu119-1A          | -0.05          | -8.05***       | 1.36     | -339.13*** | -206.07*** | -115.13*** | 0.27     | -0.81*   |
| Ogu34-1A           | -1.10***       | -11.61***      | 1.70*    | 78.49*     | 25.99      | -0.97      | 1.78***  | 1.05**   |
| Ogu125-8A          | -0.10          | -2.99***       | 1.42     | 171.71***  | 170.43***  | 71.14***   | 2.30***  | 1.30***  |
| Ogu33-1A           | -0.71**        | -9.44***       | -9.03*** | -603.51*** | -245.12*** | -175.41*** | -4.70*** | -3.22*** |
| Testers            |                |                |          |            |            |            |          |          |
| DH-18-8-1          | 0.25           | 1.29***        | -0.70    | -145.43*** | -67.08***  | -39.01***  | -2.78*** | -1.39*** |
| DH-18-8-3          | 0.16           | 0.28           | -0.59    | -27.38     | -2.74      | -25.86***  | 0.85***  | 0.25     |
| DH-53-1            | -0.40**        | -0.36          | 1.38**   | 183.02***  | 78.32***   | 31.56***   | 2.12***  | 1.29***  |
| DH-53-6            | -0.34*         | -0.72*         | 0.86*    | -3.38      | -35.79**   | -3.36      | -1.09*** | -0.62*** |
| DH-53-9            | 0.11           | 0.14           | -1.35**  | -38.20*    | -1.61      | 11.89      | 0.95***  | 0.25     |
| DH-53-10           | 0.21           | -0.64*         | 0.40     | 31.37      | 28.91*     | 24.76***   | -0.06    | 0.22     |
| CD 95% GCA(Line)   | 0.51           | 1.03           | 1.54     | 66.17      | 47.32      | 26.66      | 1.00     | 0.65     |
| CD 95% GCA(Tester) | 0.28           | 0.57           | 0.84     | 36.24      | 25.92      | 14.60      | 0.55     | 0.36     |

367  
368 \* , \*\* , \*\*\* , \*\*\*\* Significance at  $P \leq 0.05$ ,  $P \leq 0.01$ ,  $P \leq 0.001$ ,  $P \leq 0.0001$ , respectively, CD: critical difference

369

370 **Table 5. Continue**

| Lines/testers         | NoL      | CL (cm) | CD (cm)  | CoL (cm) | CSI (cm <sup>2</sup> ) | LSI (cm <sup>2</sup> ) | HI %     | TMY (t/ha) |
|-----------------------|----------|---------|----------|----------|------------------------|------------------------|----------|------------|
| Ogu122-5A             | -0.48    | -0.06   | -0.17    | -0.30*** | -2.18                  | 42.94                  | 3.07*    | 8.54***    |
| Ogu115-33A            | 0.79     | 0.15    | 0.18     | 0.26**   | 2.84                   | 198.54***              | -5.79*** | 1.05       |
| Ogu118-6A             | 1.63***  | 0.05    | -0.07    | -0.23**  | -1.02                  | 132.96***              | -5.21*** | 0.96       |
| Ogu307-33A            | 0.29     | -0.34   | 0.17     | -0.07    | -3.82                  | 261.97***              | -3.71**  | 0.45       |
| Ogu309-2A             | -1.54**  | -0.41*  | -0.72*** | -0.05    | -12.58***              | -200.01***             | 6.05***  | -0.20      |
| Ogu33A                | 1.13*    | 0.33    | 0.01     | 0.00     | 3.38                   | -40.80                 | -1.78    | 7.17***    |
| OguKt-2-6A            | -0.15    | 0.21    | 0.38*    | -0.15    | 5.62                   | 445.65***              | -4.05**  | 8.92***    |
| Ogu1A                 | 0.96*    | 0.31    | 0.48**   | -0.48*** | 8.43**                 | -4.68                  | -0.23    | 0.73       |
| Ogu13-85-6A           | 1.41**   | -0.47*  | -0.70*** | -0.22**  | -12.56***              | -281.45***             | -1.56    | -1.66      |
| Ogu1-6A               | -2.43*** | 0.25    | 0.77***  | -0.26**  | 9.57**                 | -231.80***             | 2.47*    | 2.51**     |
| Ogu2A                 | 1.91***  | -0.12   | 0.20     | -0.11    | 0.13                   | -143.18***             | -2.02    | -6.38***   |
| OguKt-9-2A            | -3.15*** | 0.35    | -0.24    | 0.22**   | 2.37                   | 28.93                  | -0.53    | -5.43***   |
| Ogu22-1A              | -1.48**  | -0.49*  | -0.46*   | 0.70***  | -3.55                  | -142.26***             | 1.93     | -1.57      |
| Ogu122-1A             | -0.59    | -0.09   | -0.16    | -0.22**  | -2.54                  | 79.39***               | -0.97    | -4.23***   |
| Ogu126-1A             | 0.29     | 0.48*   | 0.25     | 0.15     | 7.58*                  | 139.82***              | 3.39**   | 4.61***    |
| Ogu12A                | -0.65    | -0.06   | -0.22    | 0.23**   | -3.34                  | -163.41***             | 5.69***  | -5.26***   |
| Ogu119-1A             | 0.96*    | 0.12    | 0.64***  | 0.26***  | 8.00**                 | -48.09*                | -2.46*   | -8.24***   |
| Ogu34-1A              | 0.91     | -0.34   | -0.18    | -0.06    | -5.98*                 | 103.02***              | -1.81    | 1.04       |
| Ogu125-8A             | 0.68     | 0.66*** | 0.66***  | 0.36***  | 14.24***               | 116.42***              | 3.52**   | 6.82***    |
| Ogu33-1A              | -0.48    | -0.54** | -0.81*** | -0.04    | -14.60***              | -293.94***             | 4.00**   | -9.80***   |
| Testers               |          |         |          |          |                        |                        |          |            |
| DH-18-8-1             | -0.01    | 0.01    | 0.36***  | 0.17***  | 3.35*                  | -135.48***             | 1.04     | -2.68***   |
| DH-18-8-3             | -0.98*** | -0.07   | -0.19    | -0.07    | -0.99                  | 36.61**                | 0.58     | -0.11      |
| DH-53-1               | 0.14     | 0.03    | 0.16     | -0.02    | 1.53                   | 100.79***              | -1.71*   | 3.13***    |
| DH-53-6               | 0.02     | 0.03    | -0.25*   | 0.00     | -2.57                  | -54.16***              | -1.87**  | -1.43**    |
| DH-53-9               | 0.97***  | -0.02   | -0.04    | 0.04     | -0.77                  | 39.02**                | 1.78**   | -0.06      |
| DH-53-10              | -0.14    | 0.03    | -0.05    | -0.12**  | -0.56                  | 13.21                  | 0.19     | 1.16*      |
| CD 95%<br>GCA(Line)   | 0.94     | 0.37    | 0.36     | 0.16     | 5.84                   | 43.25                  | 2.42     | 1.89       |
| CD 95%<br>GCA(Tester) | 0.51     | 0.20    | 0.20     | 0.09     | 3.20                   | 23.69                  | 1.32     | 1.04       |

371  
372 \* , \*\* , \*\*\* , \*\*\*\* Significance at  $P \leq 0.05$ ,  $P \leq 0.01$ ,  $P \leq 0.001$ ,  $P \leq 0.0001$ , respectively, CD: critical difference

373

374 The highest SCA effect in desirable negative direction for days to 50% CI was recorded in  
375 hybrid Ogu307-33A × DH-18-8-3 (non significant GCA × poor combiner) followed by Ogu34-  
376 1A × DH-53-1 (good general combiner × good combiner) and Ogu309-2A × DH-53-9 (poor  
377 combiner × poor combiner). For the days to 50% CM, the highest SCA effect in desirable  
378 negative direction was observed in the cross Ogu22-1A × DH-53-10 (poor combiner × good  
379 general combiner) followed by Ogu125-8A × DH-53-6 (good general combiner × good  
380 combiner) and Ogu1A × DH-18-8-3 (poor combiner × poor combiner). Among the 120 testcross  
381 progenies, 31 crosses exhibited high significant positive SCA effects for PH (S2 Table). The  
382 highest positive significant SCA effect for PH was observed in the cross Ogu122-1A × DH-18-8-  
383 3 (good general combiner × poor combiner) followed by Ogu13-85-6A × DH-53-1 (poor  
384 combiner × good combiner), Ogu13-85-6A × DH-18-8-3 (poor combiner × poor combiner) and  
385 Ogu118-6A × DH-53-9 (non significant GCA × poor combiner). For the commercial traits viz.  
386 GPW, MCW, NCW, CL, CD, CoL and CSI, out of 120 crosses, 39, 32, 38, 10, 26, 33 and 24  
387 crosses exhibited significantly high SCA effects in desirable direction (S2 Table). For the  
388 vegetative traits, among 120 crosses, 44, 37, 33 and 48 crosses showed significantly high  
389 positive SCA effects for LL, LW, NoL and LSI, respectively. For the HI and TMY, among 120  
390 hybrids, 18 and 32 hybrids displayed significantly high positive SCA effects, respectively (S2  
391 Table). The cross combination Ogu22-1A × DH-53-6 (poor combiner × poor combiner)  
392 exhibited highest positive significant SCA effect for GPW followed by Ogu307-33A × DH-18-8-  
393 3 (good general combiner × poor combiner) and Ogu122-5A × DH-53-10 (good general  
394 combiner × non significant GCA). For the MCW, hybrid Ogu33A × DH53-1 (good combiner ×  
395 good combiner) showed highest positive significant SCA effects followed by Ogu122-5A × DH-  
396 53-10 (good combiner × good combiner) and Ogu1-6A × DH-53-1 (good combiner × good

397 combiner). The highest significantly positive SCA estimate for NCW was observed in the cross  
398 Ogu33A × DH-53-1 (good combiner × good combiner) followed by Ogu1A × DH-53-9 (poor  
399 combiner × non significant GCA) and Ogu22-1A × DH-53-6 (poor combiner × poor combiner).  
400 With respect to CL, the highest significant positive SCA effect was observed in the cross  
401 Ogu119-1A × DH18-8-1 (non significant GCA × non significant GCA) followed by Ogu122-1A  
402 × DH-53-10 (poor combiner × non significant GCA) and Ogu122-5A × DH-53-10 (poor  
403 combiner × non significant GCA), likewise for CD, the highest positive SCA effect was recorded  
404 in the cross combination Ogu13-85-6A × DH-18-8-3 (poor combiner × poor combiner) followed  
405 by Ogu2A × DH-53-6 (non significant GCA × poor combiner) and Ogu122-1A × DH-53-10  
406 (poor combiner × poor combiner). Then, for the CoL the highest significant SCA effect in  
407 desirable negative direction was observed in the cross Ogu12A × DH-53-10 (poor combiner ×  
408 good general combiner) followed by Ogu2A × DH-18-8-1 (non significant GCA × poor  
409 combiner) and Ogu119-1A × DH-53-1 (poor combiner × non significant GCA). The cross  
410 combination Ogu119-1A × DH-18-8-1 (good combiner × good combiner) exhibited highest  
411 positive SCA effect for CSI. The crosses Ogu13-85-6A × DH-53-1 (poor combiner × good  
412 combiner) followed by Ogu118-6A × DH-53-9 (good combiner × good combiner) and Ogu12A  
413 × DH-18-8-1 (poor combiner × poor combiner) displayed highest significant positive SCA effect  
414 for LL, similarly for LW, the highest positive significant SCA estimate was observed in the  
415 hybrid Ogu12A × DH-18-8-1 (poor combiner × poor combiner) followed by Ogu33-1A × DH-  
416 53-9 (poor combiner × non significant GCA) and Ogu22-1A × DH-53-1 (poor combiner × good  
417 combiner). With respect to NoL, the highest positive significant SCA effect was recorded in  
418 cross combination OguKt2-6A × DH-53-10 (poor combiner × poor combiner) followed by  
419 Ogu2A × DH-53-9 (good combiner × good combiner) and Ogu13-85-6A × DH-18-8-1 (good

420 combiner × poor combiner). For the LSI, the cross Ogu12A × DH-18-8-1 (poor combiner × poor  
421 combiner) exhibited highest significant positive SCA effect. Then, the crosses Ogu33A × DH-  
422 53-1 (poor combiner × poor combiner) followed by Ogu125-8A × DH-18-8-1 (good combiner ×  
423 non significant GCA) and Ogu122-5A × DH-53-9 (good combiner × good combiner) displayed  
424 highest significant positive SCA effects for HI. For the total marketable yield (TMY), the highest  
425 significant SCA estimate in desirable positive direction was observed in the cross Ogu33A ×  
426 DH-53-1 (good combiner × good combiner) followed by Ogu122-5A × DH-53-10 (good  
427 combiner × good combiner) and Ogu1-6A × DH-53-1 (good combiner × good combiner) (S2  
428 Table).

## 429 **Mean performance and cluster analysis based on agronomic traits**

430 The mean performance of parental CMS and DH lines along with standard checks is presented in  
431 supplement S3 Table. On the basis of curd initiation, the CMS lines Ogu307-33A and Ogu13-85-  
432 6A were earliest among rest of parental lines and the entire four standard checks as well (S3  
433 Table). Similarly, CMS lines Ogu307-33A and Ogu33-1A were earliest among all the parents  
434 and checks with respect to curd maturity. Then CMS line Ogu22-1A, OguKt-9-2A, Ogu12A and  
435 DH lines DH-53-1, DH-53-10 had highest plant height. While, CMS lines Ogu115-33A and  
436 Ogu309-2A was having dwarfed structure in contrast to other parental lines. The highest number  
437 of leaves was observed in CMS lines Ogu34-1A and Ogu309-2A. The shortest core length was  
438 recorded in genotype Ogu13-85-6A and Ogu309-2A. The tester DH-53-1 was having highest  
439 MCW. The highest total marketable yield was recorded in CMS line Ogu33A and Ogu125-8A,  
440 whereas the tester DH-18-8-1 was having highest TMY among all the parental genotypes and  
441 standard checks. Principal component analysis (PCA) and hierarchical cluster analysis (HCA)  
442 based on 16 agronomic traits (days to 50% CI, days to 50% CM, PH, GPW, MCW, NCW, LL,



443 LW, NoL, CL, CD, CoL, LSI, CSI, HI and TMY) were performed for grouping of 26 parental  
444 CMS and DH inbred lines of 120 testcross progenies (Figs 1a and b). The PCA revealed that, the  
445 first two dimensions (PC1 and PC2) captured 36.2% and 18.9% of total existing variation among  
446 the parental lines. The HCA based dendrogram depicting inter-relationships displayed high  
447 genetic divergence among 26 CMS and DH lines based upon Euclidean distance matrix (Fig 1b).  
448 The HCA of 26 parental lines on the basis of 16 phenotypic traits classified parental CMS and  
449 DH lines into 3 major clusters with varying extent of divergence within internal sub-clusters. The  
450 DH lines DH-53-10 and DH-18-8-1 was distantly placed from rest of DH testers in two different  
451 major clusters.

452 **Fig1a. Percentage of explained variance among parental CMS and DH lines in different**  
453 **principal components**

454 **Fig1 b. Dendrogram illustrating the genetic relationships among 26 parental lines based on**  
455 **16 phenotypic traits.**

456 **SSR and EST-SSRs based polymorphism, allelic diversity and**  
457 **genetic distances**

458 In the present investigation, 350 pairs of microsatellite markers (genomic-SSR and EST-SSRs)  
459 based primers distributed throughout the *Brassica oleracea* genome were tested to assess the  
460 molecular diversity in parental CMS and DH lines of cauliflower. Out of 350 microsatellite  
461 primers, 87 pairs of primers displayed clear cut polymorphism and revealed high allelic diversity  
462 (Table 6). The allele frequency analysis revealed that overall 511 alleles were amplified through  
463 87 microsatellite primers (Table 6) with mean number of alleles per locus was 5.87. The allele  
464 numbers per locus ranged from 2 (1 primer BoSF1640) to 10 (1 primer: BRAS011) (Table 6).

465 The observed heterozygosity ( $H_o$ ) ranged from 0.03 (for the loci BoSF2232, BoSF062,  
466 BRAS011, BoESSR080, BoSF2406 and BoSF2421) to 0.19 (for the loci BoSF2294a). The mean  
467 expected heterozygosity ( $H_e$ ) was 0.68, with a range of 0.27 (primer *cnu107*) to 0.83 (for primer  
468 Na12F03a and BoESSR041) and had higher mean value than  $H_o$ . The mean polymorphic  
469 information content (PIC) for 87 loci was 0.63. The PIC content ranged from 0.24 for the primer  
470 *cnu107* to 0.80 for the primer Na12F03a (Table 6). Further, the PCA and Neighbour joining (NJ)  
471 cluster analysis based on molecular data for 87 loci, revealed distinct clusters and sub-clusters of  
472 parental CMS and DH lines based on their phylogeny (Fig 2). The PCA revealed that first two  
473 major coordinate axis 1 and 2 (PC1 and PC2) explained 61.41% of total existing variation among  
474 CMS and DH lines. The dendrogram constructed revealed 3 main clusters of parental lines with  
475 internal sub-clusters showing varying degree of diversity. As the less extent of variation  
476 explained by first two main coordinate axes (PC1 and PC2), the NJ clusters gave clear picture of  
477 clustering groups for better interpretation. The DH testers remained in 2 different sub-clusters of  
478 single main cluster. The CMS lines Ogu2A and OguKt-9-2A placed distantly from rest of CMS  
479 lines. The CMS lines Ogu33-1A and Ogu125-8A were in close affinity with DH lines.

480 The Euclidean distance (PD) between lines and testers were computed from 16 phenotypic traits  
481 (supplement Table S3) and GD was calculated from molecular data based on 87 microsatellite  
482 markers (genomic-SSR and EST-SSRs) used for assessment of genetic diversity between parents  
483 (S4 Table). The PD was ranged from 2.07 for the cross L16  $\times$  T6 (Ogu12A  $\times$  DH-53-10) to 8.27  
484 for the cross combination L5  $\times$  T1 (Ogu309-2A  $\times$  DH-18-8-1) with a mean of 5.52. The GD was  
485 ranged from 0.44 for the cross L20  $\times$  T1 (Ogu33-1A  $\times$  DH-18-8-1) to 0.98 for the cross  
486 combinations L4  $\times$  T5 (Ogu307-33A  $\times$  DH-53-9) with the average GD of 0.83.

487

488 **Table 6. Characteristics of 87 polymorphic SSR and EST-SSRs loci depicting diversity**

| Locus     | LG  | H <sub>o</sub> | H <sub>e</sub> | N  | PIC  | Locus     | LG  | H <sub>o</sub> | H <sub>e</sub> | N | PIC  |
|-----------|-----|----------------|----------------|----|------|-----------|-----|----------------|----------------|---|------|
| BoSF2304b | C09 | 0.00           | 0.48           | 5  | 0.43 | BoESSR303 | C04 | 0.00           | 0.33           | 4 | 0.31 |
| BoSF1740  | C08 | 0.00           | 0.63           | 5  | 0.57 | BoESSR333 | C04 | 0.00           | 0.81           | 9 | 0.77 |
| BoSF378   | C08 | 0.00           | 0.72           | 4  | 0.65 | BoESSR338 | C08 | 0.00           | 0.77           | 8 | 0.72 |
| BoSF2680  | C08 | 0.00           | 0.78           | 5  | 0.73 | BoESSR403 | C08 | 0.00           | 0.72           | 7 | 0.66 |
| BoSF2054  | C06 | 0.00           | 0.52           | 3  | 0.41 | BoESSR409 | C04 | 0.00           | 0.78           | 6 | 0.73 |
| BoSF1215  | C06 | 0.00           | 0.59           | 6  | 0.54 | BoESSR576 | C06 | 0.00           | 0.71           | 6 | 0.65 |
| BoSF250   | C06 | 0.00           | 0.67           | 3  | 0.58 | BoESSR581 | C06 | 0.00           | 0.67           | 7 | 0.62 |
| BoSF2505  | C06 | 0.00           | 0.60           | 4  | 0.54 | BoESSR632 | C01 | 0.00           | 0.71           | 6 | 0.67 |
| BoSF2374  | C05 | 0.00           | 0.62           | 4  | 0.54 | BoESSR901 | C09 | 0.00           | 0.77           | 7 | 0.73 |
| BoSF1846  | C05 | 0.00           | 0.69           | 4  | 0.62 | BoESSR766 | C03 | 0.00           | 0.69           | 7 | 0.63 |
| BoSF2878  | C05 | 0.00           | 0.57           | 3  | 0.48 | BoESSR825 |     | 0.00           | 0.69           | 7 | 0.63 |
| BoSF912   | C01 | 0.00           | 0.72           | 6  | 0.67 | BoESSR673 | C03 | 0.00           | 0.66           | 5 | 0.58 |
| BoSF063   | C01 | 0.00           | 0.74           | 8  | 0.69 | BoESSR758 | C07 | 0.00           | 0.68           | 7 | 0.64 |
| BoSF2294a | C02 | 0.19           | 0.73           | 6  | 0.67 | BoESSR763 | C04 | 0.00           | 0.80           | 8 | 0.76 |
| BoSF2615  | C02 | 0.00           | 0.61           | 4  | 0.55 | BoESSR863 | C06 | 0.00           | 0.69           | 4 | 0.62 |
| BoSF1167  | C02 | 0.00           | 0.79           | 6  | 0.75 | BoESSR903 | C06 | 0.00           | 0.50           | 5 | 0.46 |
| BoSF2248  | C03 | 0.00           | 0.60           | 5  | 0.55 | Na12F03a  | C07 | 0.07           | 0.83           | 8 | 0.80 |
| BoSF2232  | C03 | 0.03           | 0.49           | 3  | 0.38 | O110B11   | C05 | 0.00           | 0.65           | 4 | 0.57 |
| BoSF184   | C04 | 0.00           | 0.73           | 7  | 0.68 | BoSF2406  | C07 | 0.03           | 0.67           | 7 | 0.62 |
| BoSF1640  | C09 | 0.00           | 0.43           | 2  | 0.33 | BoSF2313  | C07 | 0.07           | 0.75           | 8 | 0.70 |
| BoSF2612  | C08 | 0.00           | 0.67           | 4  | 0.59 | BoSF2033  | C07 | 0.00           | 0.81           | 9 | 0.77 |
| BoSF2860  | C07 | 0.04           | 0.76           | 8  | 0.71 | BoSF317   | C05 | 0.00           | 0.70           | 6 | 0.66 |
| BoSF2345  | C01 | 0.00           | 0.76           | 5  | 0.71 | BoSF2421  | C09 | 0.03           | 0.61           | 6 | 0.57 |
| BoSF1207  | C01 | 0.07           | 0.77           | 8  | 0.73 | BoSF1957  | C04 | 0.00           | 0.82           | 8 | 0.77 |
| BoSF042   | C03 | 0.00           | 0.73           | 6  | 0.68 | Na12B09   | C03 | 0.00           | 0.70           | 6 | 0.66 |
| BoSF062   | C03 | 0.03           | 0.51           | 5  | 0.46 | cnu107    | C02 | 0.00           | 0.27           | 3 | 0.24 |
| BoSF2985  | C03 | 0.00           | 0.68           | 4  | 0.60 | BoSF1131  | C03 | 0.00           | 0.78           | 7 | 0.73 |
| BoE862    | C04 | 0.00           | 0.75           | 6  | 0.70 | BoSF966   | C03 | 0.00           | 0.80           | 7 | 0.75 |
| BRAS011   | C02 | 0.03           | 0.77           | 10 | 0.73 | CB10258   | C01 | 0.00           | 0.78           | 8 | 0.73 |
| BrBAC214  | C03 | 0.00           | 0.48           | 5  | 0.43 | BoESSR920 | C09 | 0.00           | 0.79           | 6 | 0.73 |
| BoESSR080 | C07 | 0.03           | 0.78           | 9  | 0.73 | BoESSR041 | C06 | 0.00           | 0.83           | 8 | 0.79 |
| BoESSR086 | C03 | 0.00           | 0.63           | 6  | 0.58 | BoESSR934 | C08 | 0.00           | 0.65           | 4 | 0.57 |
| BoESSR087 | C04 | 0.00           | 0.70           | 5  | 0.65 | Ni4D12    | C02 | 0.00           | 0.57           | 3 | 0.48 |
| BoESSR089 | C01 | 0.00           | 0.80           | 7  | 0.76 | cnu149    | C05 | 0.00           | 0.81           | 8 | 0.76 |
| BoESSR105 | C04 | 0.00           | 0.76           | 6  | 0.71 | BoESSR482 | C02 | 0.00           | 0.79           | 7 | 0.75 |
| BoESSR108 | C04 | 0.00           | 0.67           | 5  | 0.60 | O112G04a  | C08 | 0.00           | 0.44           | 4 | 0.40 |
| BoESSR122 | C02 | 0.00           | 0.82           | 8  | 0.78 | BoESSR492 | C03 | 0.00           | 0.76           | 8 | 0.72 |
| BoESSR151 | C02 | 0.00           | 0.70           | 6  | 0.65 | BoESSR510 | C03 | 0.00           | 0.59           | 4 | 0.51 |
| BoESSR206 | C05 | 0.00           | 0.53           | 4  | 0.47 | BoESSR523 | C07 | 0.00           | 0.76           | 7 | 0.71 |
| BoESSR207 | C05 | 0.00           | 0.78           | 5  | 0.72 | BoESSR560 | C03 | 0.00           | 0.73           | 6 | 0.67 |
| BoESSR208 | C04 | 0.00           | 0.71           | 8  | 0.66 | BoESSR736 | C05 | 0.00           | 0.66           | 5 | 0.61 |
| BoESSR212 | C07 | 0.00           | 0.56           | 4  | 0.51 | BoESSR030 | C03 | 0.00           | 0.76           | 8 | 0.71 |
| BoESSR216 | C01 | 0.00           | 0.76           | 5  | 0.70 | BoESSR073 | C03 | 0.00           | 0.50           | 6 | 0.46 |
| BoESSR248 | C04 | 0.00           | 0.62           | 5  | 0.57 |           |     |                |                |   |      |

489 LG: linkage group, H<sub>o</sub>: observed heterozygosity, H<sub>e</sub>: expected heterozygosity, PIC: polymorphic information content

490 **Fig 2. Dendrogram of parental lines through UPGMA cluster analysis illustrating the**  
491 **genetic relationships among them based on SSR and EST-SSR analysis (molecular data).**

## 492 **Genetic structure analysis**

493 To infer pedigree and genetic clusters of 26 parental inbred lines, genetic structure analysis was  
494 performed using Bayesian approach by STRUCTURE version 2.3.4 under admixture model with  
495 correlated allele frequencies and as far as possible this model attempts to identify population  
496 clusters which are not in disequilibrium. The range of demes ( $k$ ) tested was  $k=1$  to  $k=10$  with  
497 15 runs for each  $k$  to quantify the extent of variation of the likelihood for each  $k$ . The result of  
498 analysis by STRUCTURE HARVESTER version v0.6.94 revealed that second order likelihood,  
499  $\Delta K$  reached to peak at  $k=4$  (Figs 3a to 3c), hence, optimal  $k$  value should be 4. This indicated  
500 that 26 parental CMS and DH inbred lines could be grouped into 4 genetic sub-clusters (CI: first  
501 cluster depicted by red color, CII: second cluster represented by light green color, CIII: third  
502 cluster is represented by blue color and CIV: fourth sub-cluster by yellow color) (Fig 3c). All the  
503 DH testers were remained in same cluster III depicted in blue color, including 2 CMS lines  
504 Ogu125-8A and Ogu33-1A, which remained in the vicinity of DH testers. Although there is  
505 minor admixture in DH-53-10 and Ogu125-8A from the genotypes of cluster I and cluster II  
506 respectively, indicating somewhat gene flow in the cluster III from cluster I and cluster II. The  
507 other CMS lines placed themselves in separate clusters. Thus 20 CMS lines used as female  
508 parent of 120 testcross progenies were grouped into 4 sub-clusters. The maximum number of  
509 CMS lines were placed in cluster I depicted by red color. There is admixture from cluster IV to  
510 the cluster I and cluster II genotypes Ogu1A, Ogu13-85-6A and Ogu122-1A, respectively.  
511 Similarly, there was minor admixture from cluster I and cluster II to cluster IV genotypes (Ogu1-

512 6A and Ogu22-1A). Thus, there were four distinct four sub-clusters including minor gene flow  
513 within some genotypes of respective clusters from each other.

514 **Fig 3. Genetic structure analysis of parental CMS and DH lines by STRUCTURE v2.3.4**  
515 **and STRUCTURE HARVESTER based upon 87 SSR, EST-SSR loci. (a) Mean  $L(k) \pm SD$**   
516 **over 15 runs for each  $k$  value from 1 to 10. (b)  $\Delta K$  calculated as  $\Delta K = m|L''(K)|/s[L(K)]$ , reached**  
517 **peak at  $k = 4$ . (c) Q-plot clustering. Inferred ancestries of CMS and DH lines based on 4 genetic**  
518 **groups. Each cluster is represented by different color and each column represent respective**  
519 **genotype allotted to respective cluster. Different color of each column depicts the percent of**  
520 **membership (vertical values on the left of cluster) of each genotype for four clusters.**

## 521 **Analysis of heterosis**

522 The heterotic response of all the 120 testcross progenies varied in magnitude and highly  
523 significant heterosis (MPH, BPH) was observed for all the 16 traits in both directions (data not  
524 presented). The top ten cross combinations based on significant MPH in desirable direction along  
525 with their BPH and SCA effects, for all the 16 vegetative and commercial traits, respectively, are  
526 presented in Table 7 and Table 8. Among the vegetative traits, for the traits related with  
527 earliness, like days to 50% CI and days to 50% CM, the cross combinations Ogu34-1A×DH-53-  
528 1 and Ogu33A×DH-53-6, showed significantly high MPH in desirable negative direction (Table  
529 7). For the days to 50% CI, the testers DH-53-1 and DH-53-9, were involved in 4 crosses  
530 individually out of top 10 crosses. For the days to 50% curd maturity, the CMS line Ogu33A as  
531 female parent was involved in 6 hybrids for earliness among top 10 hybrids. Ogu33A was also  
532 involved as female parent in one of the top 10 cross combinations related to days to 50% CI.  
533 This line had significantly highest GCA for earliness among all the CMS lines used in the study.  
534 Thus, CMS line Ogu33A could be used as good parent for generating early F<sub>1</sub> hybrids in

535 cauliflower. For the PH, among the top 10 heterotic crosses, the cross combination Ogu118-  
536 6A×DH-53-9 exhibited highest significant positive heterosis over mid-parent followed by  
537 OguKt-2-6A×DH-53-9 and Ogu34-1A×DH-53-9. The highest significant positive heterosis for  
538 GPW was observed in the cross Ogu118-6A×DH-53-10 over mid-parent followed by Ogu126-  
539 1A×DH-53-1 and Ogu307-33A×DH-18-8-3. The highest significant MPH for NoL in desirable  
540 direction was found in the cross combination OguKt-2-6A×DH-53-10 followed by Ogu115-  
541 33A×DH-53-10 and Ogu1A×DH-53-6, likewise with respect to LSI, the highest positive  
542 significant MPH was observed in the cross Ogu126-1A×DH-53-1 followed by OguKt-2-  
543 6A×DH-53-1 and Ogu126-1A×DH-53-10. With respect to LL, the cross Ogu126-1A×DH-53-1  
544 showed highest significant MPH in positive direction followed by OguKt-2-6A×DH-53-1 and  
545 Ogu115-33A×DH-18-8-3. For the LW, the cross combination OguKt-2-6A×DH-53-1 exhibited  
546 highest significant positive heterosis over mid-parent followed by Ogu126-1A×DH-53-10 and  
547 Ogu126-1A×DH-53-1. The cross OguKt-2-6A×DH-53-1 was highest and second highest among  
548 top 10 crosses, with significant positive MPH for LW and LL, respectively. The CMS lines  
549 OguKt-2-6A had significantly high positive GCA for both LL and LW. The top ten crosses  
550 having significant positive MPH for 8 commercial traits are presented in Table 8.

551 A short core length is desirable in cauliflower. The hybrid Ogu122-1A×DH-53-6 exhibited  
552 significantly highest MPH for CoL in desirable negative direction followed by Ogu1A×DH-53-6  
553 and Ogu1A×DH-53-10. The CMS line Ogu1A was involved in 3 crosses as female parent among  
554 top 4 crosses with respect to CoL, and it had significantly highest GCA in desirable negative  
555 direction for CoL. Thus, Ogu1A could be used as parent for developing hybrids with short core.

556 **Table 7. MPH of top ten crosses along with their BPH, mean performance and SCA effects (value in parenthesis) for 8 vegetative**  
 557 **traits**  
 558

| Days to 50% curd initiation |                    |         |                  | Days to 50% curd maturity |                       |          |                  |
|-----------------------------|--------------------|---------|------------------|---------------------------|-----------------------|----------|------------------|
| Cross combination           | MPH%               | BPH%    | Mean performance | Cross combination         | MPH%                  | BPH%     | Mean performance |
| Ogu34-1A×DH-53-1            | -6.35** (-3.26***) | -7.19** | 86.00            | Ogu33A×DH-53-6            | -17.11** (-4.94***)   | -17.11** | 126.00           |
| Ogu2A×DH-53-1               | -5.43** (-0.93)    | -7.85** | 90.00            | Ogu33A×DH-53-1            | -15.81** (-2.64*)     | -16.27** | 128.66           |
| Ogu2A×DH-53-9               | -5.37** (-0.45)    | -6.83** | 91.00            | Ogu33A×DH-53-9            | -13.41** (-0.48)      | -13.60** | 131.33           |
| Ogu33A×DH-53-1              | -4.69** (-1.65**)  | -5.04** | 88.00            | Ogu33A×DH-18-8-1          | -12.58** (-3.29*)     | -14.69** | 129.66           |
| Ogu309-2A×DH-53-9           | -4.50** (-2.72***) | -6.69** | 88.33            | Ogu22-1A×DH-53-10         | -12.54** (-13.58***)  | -12.64** | 133.66           |
| Ogu125-8A×DH-53-1           | -3.99** (-1.93**)  | -4.68** | 88.33            | Ogu1A×DH-18-8-3           | -10.27** (-11.61***)  | -10.37** | 138.33           |
| Ogu307-33A×DH-18-8-3        | -3.59** (-5.44***) | -6.59** | 85.00            | Ogu33A×DH-18-8-3          | -10.24** (5.39***)    | -10.82** | 137.33           |
| OguKt-2-6A×DH-53-9          | -3.57** (-0.73)    | -4.93** | 90.00            | Ogu33A×DH-53-10           | -10.07** (5.97***)    | -10.26** | 137.00           |
| Ogu1A×DH-53-9               | -3.57** (-0.61)    | -4.93** | 90.00            | Ogu118-6A×DH-53-6         | -9.24** (-6.89***)    | -14.91** | 129.33           |
| Ogu2A×DH-18-8-1             | -3.36** (-0.58)    | -6.83** | 91.00            | Ogu2A×DH-18-8-3           | -8.52** (-10.06***)   | -9.31**  | 139.66           |
|                             |                    |         |                  |                           |                       |          |                  |
| Plant Height (PH)           |                    |         |                  | Gross Plant Weight (GPW)  |                       |          |                  |
| Cross combination           | MPH%               | BPH%    | Mean Performance | Cross combination         | MPH%                  | BPH%     | Mean Performance |
| Ogu118-6A×DH-53-9           | 57.77** (11.18***) | 48.05** | 65.63            | Ogu118-6A×DH-53-10        | 170.14** (1018.24***) | 123.75** | 3442.00          |
| OguKt-2-6A×DH-53-9          | 54.21** (6.47***)  | 52.93** | 67.80            | Ogu126-1A×DH-53-1         | 122.47** (800.31***)  | 76.74**  | 3178.33          |
| Ogu34-1A×DH-53-9            | 53.53** (8.96***)  | 45.34** | 64.43            | Ogu307-33A×DH-18-8-3      | 121.64** (1172.05***) | 84.71**  | 3472.00          |
| Ogu13-85-6A×DH-53-1         | 48.12** (13.61***) | 25.41** | 66.80            | Ogu115-33A×DH-53-9        | 118.03** (692.97***)  | 60.66**  | 3103.33          |
| OguKt-2-6A×DH-18-8-1        | 45.77** (5.59**)   | 37.61** | 67.56            | OguKt-2-6A×DH-53-1        | 108.76** (569.98***)  | 93.55**  | 3480.66          |
| Ogu13-85-6A×DH-18-8-3       | 45.06** (11.18***) | 27.09** | 62.40            | Ogu307-33A×DH-18-8-1      | 107.02** (834.10***)  | 81.65**  | 3016.00          |
| Ogu307-33A×DH-18-8-3        | 44.98** (10.93***) | 33.27** | 65.43            | Ogu1-6A×DH-53-1           | 105.85** (849.37***)  | 72.94**  | 3110.00          |
| Ogu2A×DH-18-8-1             | 44.85** (9.28***)  | 28.04** | 62.86            | Ogu22-1A×DH-53-6          | 104.61** (1175.32***) | 58.34**  | 3180.00          |
| Ogu34-1A×DH-53-1            | 44.72** (8.99***)  | 26.16** | 67.20            | Ogu1A×DH-53-9             | 99.19** (1022.31***)  | 61.62**  | 3122.00          |
| Ogu115-33A×DH-53-6          | 41.93** (7.58***)  | 20.13** | 61.26            | Ogu115-33A×DH-53-1        | 98.53** (61.76)       | 49.77**  | 2693.33          |

559 \* = significant at 5% probability, \*\* = significant at 1% probability, \*\*\* = significant at 0.1%, \*\*\*\* = significant at 0.01% probability through F test, MPH: Mid  
 560 parent heterosis, BPH: better parent heterosis, SCA: specific combining ability (value in parenthesis)

561 **Table 7. continue**

562

| Number of leaves (NoL) |                    |         |                  | Leaf size index (LSI) |                      |          |                  |
|------------------------|--------------------|---------|------------------|-----------------------|----------------------|----------|------------------|
| Cross combination      | MPH%               | BPH%    | Mean performance | Cross combination     | MPH%                 | BPH%     | Mean Performance |
| OguKt-2-6A×DH-53-10    | 54.35** (5.53***)  | 42.00** | 23.66            | Ogu126-1A×DH-53-1     | 155.50** (313.65***) | 129.09** | 1673.66          |
| Ogu115-33A×DH-53-10    | 51.65** (3.92***)  | 40.82** | 23.00            | OguKt-2-6A×DH-53-1    | 144.80** (326.37***) | 122.09** | 1992.21          |
| Ogu1A×DH-53-6          | 42.27** (3.59**)   | 23.21** | 23.00            | Ogu126-1A×DH-53-10    | 130.23** (397.38***) | 91.70**  | 1669.81          |
| Ogu2A×DH-53-9          | 41.59** (5.36***)  | 37.93** | 26.66            | Ogu115-33A×DH-53-6    | 118.91** (345.14***) | 169.04** | 1608.92          |
| Ogu118-6A×DH-53-10     | 41.05** (2.42*)    | 26.42** | 22.33            | Ogu118-6A×DH-53-1     | 112.80** (70.98)     | 94.93**  | 1424.14          |
| Ogu33A×DH-53-1         | 40.00** (3.64**)   | 25.00** | 23.33            | Ogu115-33A×DH-53-10   | 111.73** (139.55*)   | 68.84**  | 1470.71          |
| Ogu2A×DH-18-8-3        | 39.39** (3.64**)   | 25.45** | 23.00            | Ogu307-33A×DH-53-10   | 99.43** (291.06***)  | 93.52**  | 1685.65          |
| Ogu12A×DH-53-10        | 37.93** (2.37*)    | 33.33** | 20.00            | Ogu34-1A×DH-53-10     | 92.48** (524.64***)  | 83.75**  | 1760.28          |
| Ogu1A×DH-53-9          | 37.37** (2.31*)    | 17.24** | 22.66            | Ogu34-1A×DH-53-1      | 90.16** (282.31***)  | 67.59**  | 1605.53          |
| Ogu122-1A×DH-53-10     | 35.48** (-2.36**)  | 28.57** | 15.33            | Ogu118-6A×DH-53-10    | 89.85** (138.28*)    | 61.17**  | 1403.87          |
| Leaf Length (LL)       |                    |         |                  | Leaf width (LW)       |                      |          |                  |
| Cross combination      | MPH%               | BPH%    | Mean Performance | Cross combination     | MPH%                 | BPH%     | Mean Performance |
| Ogu126-1A×DH-53-1      | 63.74** (4.77***)  | 54.68** | 60.06            | OguKt-2-6A×DH-53-1    | 58.71** (2.47**)     | 49.30**  | 31.90            |
| OguKt-2-6A×DH-53-1     | 54.77** (4.92***)  | 49.05** | 62.50            | Ogu126-1A×DH-53-10    | 56.87** (4.90***)    | 46.47**  | 28.36            |
| Ogu115-33A×DH-18-8-3   | 54.42** (8.01***)  | 26.65** | 62.56            | Ogu126-1A×DH-53-1     | 56.22** (3.31***)    | 47.79**  | 27.83            |
| Ogu115-33A×DH-53-10    | 51.09** (4.11**)   | 28.85** | 57.76            | Ogu118-6A×DH-53-1     | 56.21** (1.33)       | 45.84**  | 27.46            |
| Ogu13-85-6A×DH-53-1    | 49.38** (13.58***) | 48.81** | 58.23            | OguKt-2-6A×DH-53-9    | 53.15** (5.27***)    | 48.97**  | 33.66            |
| Ogu126-1A×DH-53-10     | 48.26** (5.72***)  | 31.23** | 58.83            | Ogu115-33A×DH-53-6    | 53.03** (3.39***)    | 43.26**  | 26.93            |
| Ogu115-33A×DH-53-9     | 47.97** (6.00***)  | 20.45** | 60.66            | Ogu34-1A×DH-53-10     | 47.39** (5.28***)    | 44.46**  | 29.13            |
| Ogu115-33A×DH-53-6     | 45.18** (7.14***)  | 17.88** | 59.76            | Ogu118-6A×DH-53-10    | 46.97** (1.16)       | 35.46**  | 26.23            |
| Ogu125-8A×DH-53-1      | 40.58** (9.03***)  | 25.47** | 62.06            | Ogu118-6A×DH-53-6     | 43.64** (1.01)       | 34.22**  | 25.23            |
| Ogu118-6A×DH-53-9      | 40.39** (10.71***) | 22.04** | 61.46            | Ogu307-33A×DH-53-10   | 42.47** (2.48**)     | 40.91**  | 27.90            |

563 \*= significant at 5% probability, \*\*= significant at 1% probability, \*\*\*= significant at 0.1%, \*\*\*\*= significant at 0.01% probability through F test, MPH: Mid  
564 parent heterosis, BPH: better parent heterosis, SCA: specific combining ability (value in parenthesis)



565  
566

**Table 8. MPH of top ten crosses along with their better parent heterosis and SCA effects (value in parenthesis) for 8 commercial traits**

| Core length (CoL)    |                     |          |                  | Curd length (CL)      |                    |         |                  |
|----------------------|---------------------|----------|------------------|-----------------------|--------------------|---------|------------------|
| Cross combination    | MPH%                | BPH%     | Mean Performance | Cross combination     | MPH%               | BPH%    | Mean Performance |
| Ogu122-1A×DH-53-6    | -30.31** (-0.88***) | -37.69** | 3.3              | Ogu119-1A×DH-18-8-1   | 36.24** (2.09***)  | 25.69** | 11.41            |
| Ogu1A×DH-53-6        | -22.91** (-0.52**)  | -27.00** | 3.4              | Ogu126-1A×DH-53-1     | 34.41** (0.75)     | 32.56** | 10.45            |
| Ogu1A×DH-53-10       | -22.50** (-0.30)    | -25.16** | 3.5              | Ogu122-1A×DH-53-10    | 33.09** (1.69***)  | 30.91** | 10.82            |
| Ogu1A×DH-53-1        | -20.61** (-0.46*)   | -26.36** | 3.4              | Ogu119-1A×DH-53-6     | 31.29** (0.77)     | 30.67** | 10.12            |
| Ogu12A×DH-53-10      | -20.18** (-1.30***) | -26.02** | 3.2              | Ogu115-33A×DH-53-9    | 31.02** (0.74)     | 27.97** | 10.06            |
| Ogu2A×DH-53-10       | -13.62** (-0.88***) | -24.20** | 3.3              | Ogu33A×DH-53-1        | 30.29** (0.45)     | 26.85** | 10.00            |
| Ogu122-1A×DH-18-8-3  | -11.58** (0.13)     | -21.87** | 4.2              | Ogu33A×DH-53-9        | 29.13** (0.39)     | 25.85** | 9.90             |
| Ogu34-1A×DH-18-8-3   | -10.83** (-0.82***) | -23.09** | 3.4              | Ogu126-1A×DH-53-6     | 29.08** (0.24)     | 28.39** | 9.95             |
| Ogu126-1A×DH-53-10   | -10.53** (-0.91***) | -19.12** | 3.5              | Ogu119-1A×DH-53-10    | 28.55** (0.90)     | 23.94** | 10.25            |
| Ogu122-5A×DH-53-6    | 12.16* (0.62**)     | 11.28    | 4.7              | Ogu115-33A×DH-53-6    | 27.65** (0.35)     | 25.59** | 9.73             |
| Curd diameter (CD)   |                     |          |                  | Curd Size index (CSI) |                    |         |                  |
| Cross combination    | MPH%                | BPH%     | Mean Performance | Cross combination     | MPH%               | BPH%    | Mean Performance |
| Ogu1-6A×DH-53-1      | 42.58** (1.40**)    | 40.80**  | 14.81            | Ogu122-1A×DH-53-10    | 84.33** (41.50***) | 73.67** | 154.33           |
| Ogu122-1A×DH-53-10   | 38.30** (1.96***)   | 32.40**  | 14.23            | Ogu126-1A×DH-53-1     | 80.34** (19.58**)  | 78.43** | 144.61           |
| Ogu22-1A×DH-53-6     | 36.73** (1.67***)   | 35.69**  | 13.43            | Ogu119-1A×DH-18-8-1   | 73.32** (42.09***) | 48.23** | 169.36           |
| Ogu307-33A×DH-18-8-1 | 34.76** (1.72***)   | 16.93**  | 14.73            | Ogu1-6A×DH-53-1       | 73.01** (17.53*)   | 67.98** | 144.55           |
| Ogu126-1A×DH-53-1    | 34.56** (0.97*)     | 33.98**  | 13.86            | Ogu33A×DH-53-1        | 72.36** (12.40)    | 64.40** | 133.24           |
| Ogu115-33A×DH-53-6   | 34.46** (0.35)      | 34.34**  | 13.30            | Ogu119-1A×DH-53-10    | 72.05** (22.91**)  | 64.60** | 146.27           |
| Ogu119-1A×DH-53-10   | 33.81** (1.21**)    | 32.78**  | 14.27            | Ogu115-33A×DH-53-6    | 70.76** (12.65)    | 67.73** | 128.84           |
| Ogu2A×DH-53-6        | 33.71** (2.09***)   | 22.84**  | 14.52            | Ogu115-33A×DH-53-9    | 69.91** (14.55*)   | 61.78** | 132.55           |
| Ogu1-6A×DH-53-6      | 33.51** (0.63)      | 29.55**  | 13.63            | Ogu119-1A×DH-53-6     | 68.05** (11.40)    | 63.54** | 132.75           |
| OguKt-2-6A×DH-53-9   | 32.44** (1.13*)     | 30.99**  | 13.95            | Ogu2A×DH-53-6         | 66.85** (34.85***) | 46.88** | 148.33           |

567 \*= significant at 5% probability, \*\*= significant at 1% probability, \*\*\*= significant at 0.1%, \*\*\*\*= significant at 0.01% probability through F test, MPH: Mid  
568 parent heterosis, BPH: better parent heterosis, SCA: specific combining ability (value in parenthesis)

569

570 **Table 8. continue**

| Marketable curd weight (MCW) |                      |          |                  | Net curd weight (NCW)        |                      |          |                  |
|------------------------------|----------------------|----------|------------------|------------------------------|----------------------|----------|------------------|
| Cross combination            | MPH%                 | BPH%     | Mean Performance | Cross combination            | MPH%                 | BPH%     | Mean Performance |
| Ogu126-1A×DH-18-8-3          | 172.31** (676.08***) | 103.25** | 1876.66          | Ogu118-6A×DH-53-10           | 193.70** (332.68***) | 171.33** | 1157.66          |
| Ogu122-5A×DH-53-10           | 130.78** (731.04***) | 100.49** | 2061.66          | Ogu1A×DH-53-9                | 145.53** (415.99***) | 103.55** | 1051.66          |
| Ogu307-33A×DH-18-8-3         | 115.93** (584.02***) | 82.02**  | 1680.66          | Ogu119-1A×DH-53-10           | 141.03** (222.18***) | 116.59** | 783.33           |
| Ogu119-1A×DH-53-10           | 104.24** (292.32***) | 58.68**  | 1203.33          | Ogu126-1A×DH-18-8-3          | 139.29** (209.86***) | 94.27**  | 903.33           |
| Ogu309-2A×DH-53-6            | 102.53** (527.68***) | 42.28**  | 1575.00          | Ogu309-2A×DH-53-10           | 132.70** (0.41)      | 108.57** | 754.33           |
| Ogu118-6A×DH-53-10           | 99.69** (344.98***)  | 95.96**  | 1486.00          | Ogu309-2A×DH-53-6            | 118.87** (337.52***) | 55.23**  | 1063.33          |
| Ogu307-33A×DH-53-10          | 96.36** (238.04***)  | 80.18**  | 1366.33          | Ogu33-1A×DH-53-10            | 105.78** (270.79***) | 98.71**  | 771.66           |
| Ogu1A×DH-53-9                | 93.86** (525.17***)  | 71.88**  | 1630.00          | Ogu309-2A×DH-18-8-3          | 101.86** (55.36)     | 63.15**  | 758.66           |
| Ogu309-2A×DH-53-10           | 93.81** (57.32)      | 54.20**  | 1169.33          | Ogu122-5A×DH-53-10           | 101.77** (280.79***) | 59.89**  | 988.66           |
| Ogu33A×DH-53-1               | 92.76** (906.90***)  | 82.90**  | 2252.66          | Ogu13-85-6A×DH-18-8-3        | 101.67** (131.61***) | 90.82**  | 887.33           |
| Harvest index (HI)           |                      |          |                  | Total marketable yield (TMY) |                      |          |                  |
| Cross combination            | MPH%                 | BPH%     | Mean Performance | Cross combination            | MPH%                 | BPH%     | Mean Performance |
| Ogu122-5A×DH-53-9            | 56.64** (17.39***)   | 50.91**  | 74.56            | Ogu126-1A×DH-18-8-3          | 172.31** (27.04***)  | 103.25** | 75.06            |
| Ogu126-1A×DH-18-8-3          | 49.16** (12.52***)   | 39.61**  | 68.80            | Ogu122-5A×DH-53-10           | 130.78** (29.24***)  | 100.49** | 82.46            |
| Ogu12A×DH-18-8-3             | 41.99** (12.71***)   | 39.41**  | 71.29            | Ogu307-33A×DH-18-8-3         | 115.93** (23.36***)  | 82.02**  | 67.22            |
| Ogu119-1A×DH-53-10           | 35.84** (10.63***)   | 23.25**  | 60.69            | Ogu119-1A×DH-53-10           | 104.24** (11.69***)  | 58.68**  | 48.13            |
| Ogu126-1A×DH-53-10           | 29.08** (3.61)       | 20.86**  | 59.51            | Ogu309-2A×DH-53-6            | 102.53** (21.11***)  | 42.28**  | 63.00            |
| Ogu122-5A×DH-53-10           | 23.63** (3.16)       | 19.30**  | 58.74            | Ogu118-6A×DH-53-10           | 99.69** (13.80***)   | 95.96**  | 59.44            |
| Ogu122-1A×DH-53-10           | 22.52** (17.08***)   | 9.31     | 68.62            | Ogu307-33A×DH-53-10          | 96.36** (9.52***)    | 80.18**  | 54.65            |
| Ogu33A×DH-53-1               | 21.79** (33.46***)   | 19.90**  | 82.29            | Ogu1A×DH-53-9                | 93.86** (21.01***)   | 71.88**  | 65.20            |
| Ogu309-2A×DH-53-6            | 21.64** (9.07**)     | 18.47**  | 65.57            | Ogu309-2A×DH-53-10           | 93.81** (2.29)       | 54.20**  | 46.77            |
| Ogu22-1A×DH-53-9             | 21.16** (12.81***)   | 7.17     | 68.84            | Ogu33A×DH-53-1               | 92.76** (36.28***)   | 82.90**  | 90.10            |

571 \*= significant at 5% probability, \*\*= significant at 1% probability, \*\*\*= significant at 0.1%, \*\*\*\*= significant at 0.01% probability through F test, MPH: Mid  
572 parent heterosis, BPH: better parent heterosis, SCA: specific combining ability (value in parenthesis)  
573

574 For the commercial traits CL and CD, the cross combinations Ogu119-1A×DH-18-8-1 followed  
575 by Ogu126-1A×DH-53-1 and Ogu122-1A×DH-53-10 for CL, Ogu1-6A×DH-53-1 followed by  
576 Ogu122-1A×DH-53-10 and Ogu22-1A×DH-53-6 for CD, were having significantly highest  
577 MPH in desirable positive direction. The cross Ogu122-1A×DH-53-10, showed highest  
578 significant positive heterosis over mid-parent for CSI. For economic trait MCW, the hybrid  
579 Ogu126-1A×DH-18-8-3 followed by Ogu122-5A×DH-53-10 and Ogu307-33A×DH-18-8-3,  
580 exhibited significantly highest positive MPH at  $P \leq 0.001$ . Likewise, for the NCW, the  
581 significant highest heterosis over mid parent in desirable positive direction was observed in the  
582 hybrid Ogu118-6A×DH-53-10 followed by Ogu1A×DH-53-9 and Ogu119-1A×DH-53-10. The  
583 cross combination Ogu122-5A×DH-53-9 (56.64%) showed highest significant MPH for percent  
584 HI followed by Ogu126-1A×DH-18-8-3 (49.16%) and Ogu12A×DH-18-8-3 (41.99%). For the  
585 total marketable yield (TMY), the highest significant heterosis over mid-parent in desirable  
586 positive direction was observed in the testcross Ogu126-1A×DH-18-8-3 followed by Ogu122-  
587 5A×DH-53-10 and Ogu307-33A×DH-18-8-3. Among the top ten crosses also wide range of  
588 MPH was recorded for TMY from 92.76% (Ogu33A×DH-53-1) to 172.31% (Ogu126-1A×DH-  
589 18-8-3).

## 590 **Association of genetic distances, heterosis and combining ability**

591 The PPMCC of GD, PD with MPH, BPH, SCA and of combining ability with heterosis for ten  
592 commercial traits is presented in Table 9 (Figs 4 a to f). The GD and PD exhibited no significant  
593 correlation coefficient with SCA for any of the traits (Table 9). SCA showed significantly  
594 positive correlation with MPH and BPH for all the traits at  $P \leq 0.01$ . No significant association  
595 of GD with MPH and BPH was observed with respect to days to 50% CM, LL, CL and CoL. For  
596 the commercial traits viz. PH, GPW, NCW, LW, CD and TMY, significant correlation was

597 observed between GD and MPH in desirable direction for the respective traits (Table 9). The  
 598 highest value of PPMCC of GD with MPH and BPH in desirable direction was observed for LW.  
 599 Thus, GD exhibited significant correlation with MPH and BPH for six traits out of ten traits  
 600 studied. However, PD exhibited no significant correlation with heterosis for majority of traits.  
 601 PD showed significant correlation with MPH for only LL in desirable direction (Table 9). PD  
 602 exhibited significant correlation in undesirable direction for CoL. However, no significant  
 603 association was observed between parental genetic distances based on phenotypic traits (PD) and  
 604 molecular data (GD) ( $r = -0.04$ ) (Fig 5).

605 **Table 9. Pearson correlation coefficients among parental genetic distance (GD, PD),**  
 606 **combining ability and heterosis in cauliflower for ten morphological and commercial traits**

| Traits     | Days to 50% CM | PH     | GPW    | NCW    | LL     | LW     | CL     | CD     | CoL    | TMY     |
|------------|----------------|--------|--------|--------|--------|--------|--------|--------|--------|---------|
| <b>GD</b>  |                |        |        |        |        |        |        |        |        |         |
| MPH        | 0.02           | 0.23*  | 0.27** | 0.21*  | 0.17   | 0.34** | 0.13   | 0.25** | -0.15  | 0.18*   |
| BPH        | 0.07           | 0.15   | 0.21*  | 0.22*  | 0.12   | 0.36** | 0.12   | 0.26** | -0.15  | 0.18*   |
| SCA        | -0.02          | -0.01  | 0.02   | -0.01  | 0.01   | 0.03   | -0.01  | 0.01   | 0.03   | 0.01    |
| <b>PD</b>  |                |        |        |        |        |        |        |        |        |         |
| MPH        | 0.12           | 0.14   | 0.07   | -0.07  | 0.22*  | 0.14   | 0.01   | -0.04  | 0.26** | -0.04   |
| BPH        | 0.11           | 0.01   | -0.07  | -0.20* | 0.16   | 0.07   | -0.07  | -0.14  | 0.24** | -0.25** |
| SCA        | 0.06           | 0.11   | 0.02   | -0.05  | 0.09   | 0.12   | 0.07   | 0.02   | 0.03   | -0.06   |
| <b>SCA</b> |                |        |        |        |        |        |        |        |        |         |
| MPH        | 0.52**         | 0.83** | 0.79** | 0.74** | 0.73** | 0.68** | 0.81** | 0.75** | 0.74** | 0.77**  |
| BPH        | 0.53**         | 0.82** | 0.78** | 0.69** | 0.69** | 0.63** | 0.74** | 0.65** | 0.69** | 0.76**  |

607  
 608 \*, \*\* significance at  $P < 0.05$  and  $P < 0.01$ , respectively, GD: genetic distance, PD: phenotypic  
 609 distance, MPH: mid parent heterosis, BPH: better parent heterosis, SCA: specific combining  
 610 ability

611

612 **Fig 4 (a, b, c, d) Pearson's correlation matrix of PD based on phenotypic traits, GD**  
613 **based on SSR, EST-SSR molecular data of 87 loci with MPH, BPH, SCA and SCA with**  
614 **MPH and BPH.** a) PPMCC of GD with BPH and MPH for 10 commercial traits, b) PPMCC of  
615 PD with MPH and BPH for 10 commercial traits, c) SCA with MPH for 10 commercial traits, d)  
616 SCA with BPH for 10 commercial traits.

617 **Fig. 4 (e, f)** e) PPMCC of GD with SCA, f) PD with SCA

618 **Fig 5. Relationship of phenotypic distance (PD) and microsatellite SSR, EST-SSRs based**  
619 **molecular distance (GD) based on all pair wise combinations of parental CMS lines and**  
620 **DH testers. GD is on X-axis and PD on Y-axis.**

## 621 **Discussion**

622 The biological phenomenon of heterosis has long been proved instrumental in enhancing  
623 agricultural productivity and has continuously captivated the plant breeders and geneticists to  
624 search on this unending process. The reliable prediction and identification of cross combinations  
625 of genetically diverse inbred lines giving heterotic performance is the key to successful hybrid  
626 breeding programmes, assuming positive correlation of GD and MPH [23]. The traditional  
627 approaches of quantitative genetics like, diallel analysis, generation mean analysis, line  $\times$  tester  
628 analysis and estimating genetic components revealing various gene effects, are effective in  
629 unraveling genetic basis of heterosis [3, 41, 54, 69]. The line  $\times$  tester analysis has revealed  
630 relative eligibility of lines and testers in determining heterotic testcross progenies. Then, GCA  
631 effects of parents, SCA effects of crosses along with estimation of genetic variance components  
632 and nature of gene action has enabled the selection of desirable parents and promising cross  
633 combinations to promulgate hybrid breeding across the crops including *Brassica oleracea* [13,  
634 15, 69, 81]. The molecular markers based approaches for genetic analysis in prediction of  
635 heterosis include two ways viz. determining association between genetic divergence of parental

636 lines and heterosis, and identification, mapping of heterotic QTLs displaying chromosome  
637 segments depicting heterosis [43]. Further, the allogamous breeding system and high inbreeding  
638 depression in *Brassica oleracea* vegetables, has facilitated the generation of numerous  
639 completely homozygous inbred lines through DH technology employing isolated microspore  
640 culture (IMC) [7-9, 25]. Globally, the genetic mechanism of CMS has been proved cost effective  
641 in enhancing the proportion of *Brassica* vegetables in hybrid vegetable seed industry. Thus, the  
642 global recognition of heterosis as ‘miraculous’ tool for feeding the world, paramount importance  
643 of CMS system in *Brassica* hybrid breeding and efficacy of DH technology in plant genetic  
644 studies, instigated us to determine heterotic crosses for agro-morphological, yield and  
645 commercial traits in cauliflower involving elite advance generation CMS lines and DH testers.

#### 646 **Heritability, genetic components of variance, combining ability**

647 The analysis of variance depicted highly significant differences among all the treatments for all  
648 the 16 agronomic traits, indicating considerable genetic differences among parents and their  
649 testcross progenies. And success of any crop breeding programme relies on genetic variation  
650 contained in studied germplasm. Similar results were reported by Garg and Lal [29], Verma and  
651 Kalia [81] for yield and related traits in early maturity Indian cauliflower, and for antioxidant  
652 traits in snowball cauliflower [69]. All the studied traits were found to be under the genetic  
653 control of both additive and non-additive gene effects, as revealed by significant mean squares of  
654 lines, testers and line  $\times$  tester interactions (Table 3). The results are in agreement with Singh et  
655 al. [69] for antioxidant traits in cauliflower and Verma and Kalia [81] for days to 50% CM, leaf  
656 area, PH, MCW, NCW, curd compactness, GPW and HI in cauliflower using SI inbred lines.  
657 The analysis of genetic components of variance (Table 4) indicated the importance of SCA in  
658 developing heterotic crosses as revealed by higher value of  $\sigma^2_{sca}$  than  $\sigma^2_{gca}$  of lines and testers for

659 majority of traits. Then, except days to 50% CM, all the vegetative and commercial traits showed  
660 predominance of dominance variance ( $\sigma^2D$ ) and greater than unity value of degree of dominance  
661 suggested over-dominance in the action of genes for vegetative and commercial traits in  
662 cauliflower. Further, except for days to 50% CM, the  $\sigma^2_{gca}/\sigma^2_{sca}$  and  $\sigma^2A/D$  suggested the non-  
663 additive genetic control of all the vegetative and commercial traits, and thus supported with high  
664 level of  $\sigma^2_{sca}$ , these results indicated the scope of heterosis breeding in genetic improvement of  
665 cauliflower with respect to these commercial traits. These findings are in accordance with Garg  
666 and Lal [29], Verma and Kalia [81] for curd and yield traits in cauliflower. As the response to  
667 natural and artificial selection relies on additive genetic variance, the narrow sense heritability  
668 ( $h^2_{ns}$ ) holds a great promise in plant breeding as it provides basis to estimate accurate selection of  
669 genotypes based on phenotypic variance ascribed to additive genetic components [22]. In this  
670 study the low to intermediate level of  $h^2_{ns}$  was observed for majority of vegetative and  
671 commercial traits suggesting non-additive genetic control of these traits, which might be due to  
672 large epistatic effects. We had also observed moderate estimates of  $h^2_{ns}$  for antioxidant traits in  
673 cauliflower in previous study [69], then results are also in agreement with Xie et al. [85] for  
674 mineral content in Chinese cabbage. Thus, the early generation selection for these vegetative and  
675 commercial traits would be difficult due to dominance effects in the expression of phenotypic  
676 variance, and hence selection must be practiced in later generations. However, high  $h^2_{ns}$  was  
677 observed with respect to earliness trait, days to 50% CM, and suggesting response to selection in  
678 early generation could be efficient. Further studies may be carried out in multiple standard  
679 environments for reaffirmation of these effects.

680 The combining ability analysis have been successfully utilized in crop breeding for evaluating  
681 parental performance and understanding dynamics of genes involved in trait expression. The

682 parental GCA estimates in desirable direction also indicates potentiality of parents in generating  
683 promising breeding populations. In the present investigation, the significantly high GCA effects  
684 of parental lines in desirable direction for the respective vegetative and commercial traits are due  
685 to predominance of additive genetic effects of genes and additive  $\times$  additive interactions [15, 69].  
686 It depicts a desirable gene flow from parents to progeny at high frequency and these parental  
687 lines exhibiting high significant GCA for the respective traits in desirable direction can be  
688 utilized to stack favorable alleles via recombination and selection [1, 13, 15, 28, 69]. Further, our  
689 results revealed that none of the parents was good general combiner for all the studied vegetative  
690 and commercial traits. These findings are in conformity with results obtained by SI and CMS  
691 lines in cauliflower for yield and quality traits [13, 69, 81] and it suggested the requirement of  
692 multiple breeding programmes in suitable experimental and mating designs for the development  
693 of productive cultivars with the accumulation of positive alleles of genes. On the other hand, the  
694 parental lines depicting GCA in opposite direction for the respective traits can be utilized to  
695 generate desirable mapping population to study the genetics of respective traits [28]. The SCA,  
696 which reflects the loci having non-additive and epistatic gene effects, can be utilized to  
697 determine specific heterotic crosses for respective trait of interest. The significantly high SCA  
698 effects manifested in desirable direction by low  $\times$  low testcrosses (poor GCA effects of both  
699 male and female parents) for instance Ogu307-33A  $\times$  DH-18-8-3 for days to 50% CI, Ogu1A  $\times$   
700 DH-18-8-3 for days to 50% CM, Ogu22-1A  $\times$  DH-53-6 for GPW and Ogu22-1A  $\times$  DH-53-6 for  
701 NCW may be attributed to dominance  $\times$  dominance type of interaction having especially  
702 complementary epistatic effects [24, 69]. This inconsistent association of GCA and SCA of  
703 respective crosses for respective traits is the indication of complex interaction of genes for  
704 quantitative traits [73]. Our results are corroborated by the findings of Verma and Kalia [81] for



705 growth and yield traits in cauliflower using SI inbred lines and Singh et al. [69] for antioxidant  
706 traits using CMS lines. The majority of testcross progenies manifesting significantly high SCA in  
707 desirable direction had at least one of the parents reflecting poor GCA effects (poor  $\times$  good  
708 general combiner or good  $\times$  poor general combiner). The examples of such crosses are Ogu22-  
709 1A  $\times$  DH-53-10 for days to 50% CM, Ogu122-1A  $\times$  DH-18-8-3 for PH, Ogu12A  $\times$  DH-53-10  
710 for CoL, Ogu307-33A  $\times$  DH-18-8-3 for GPW and it may be attributed to good combiner parent  
711 depicting favourable additive effects and poor combiner parent displaying epistatic effects [24,  
712 69]. The crosses, manifesting significant SCA in desirable direction for respective traits, having  
713 both parents with good GCA (good general combiner  $\times$  good general combiner) such as Ogu33A  
714  $\times$  DH53-1 for MCW, Ogu33A  $\times$  DH-53-1 for NCW and Ogu33A  $\times$  DH-53-1 for TMY,  
715 suggested the role of cumulative effects of additive  $\times$  additive interaction of positive alleles [24,  
716 69]. These findings are in compliance with results of Verma and Kalia [81] for growth and curd  
717 traits in cauliflower and Singh et al. [69] for antioxidant pigments in cauliflower. Concurrently,  
718 some of the crosses had poor SCA effects for the respective traits, despite involving parents with  
719 significant GCA, and it might be ascribed to absence of any interaction among the positive  
720 alleles of genes. Similar results were also reported by Singh et al. [69] with respect to quality  
721 traits in cauliflower and indicated the value of SCA in contrast to GCA in determining specific  
722 crosses superior for respective vegetative or commercial traits. Thus, our results suggested that  
723 breeders must pay attention to both GCA and SCA in the selection of elite parents for the  
724 development of heterotic hybrids. Further, the recombination breeding and random mating in  
725 conjunction with selection among segregates (recurrent selection), synthetics, composites, may  
726 be exploited to harness utility of both additive and non-additive gene effects in cauliflower [81].  
727 The high SCA effects is not always correlated with significantly high heterosis and concurrently,

728 the heterotic crosses exhibiting high MPH and BPH were not always had significant SCA  
729 effects. In the present study regarding this context, the heterotic crosses such as Ogu2A×DH-53-  
730 1, Ogu2A×DH-53-9 for days to 50% CI, Ogu33A×DH-53-9 for days to 50% CM, Ogu115-  
731 33A×DH-53-1 for GPW, Ogu118-6A×DH-53-1 for LSI, Ogu118-6A×DH-53-1 with respect to  
732 LW (Table 7) and crosses Ogu1A×DH-53-10 for CoL, Ogu126-1A×DH-53-1 for CL, Ogu115-  
733 33A×DH-53-6 for CD, Ogu33A×DH-53-1 for CSI, Ogu309-2A×DH-53-10 for MCW, Ogu309-  
734 2A×DH-53-10 with respect to NCW, Ogu126-1A×DH-53-10 for HI, Ogu309-2A×DH-53-10 for  
735 TMY (Table 8) were among top 10 crosses out of overall 120 crosses having significant MPH  
736 and BPH in desirable direction for the respective traits, but all these testcrosses had non  
737 significant poor SCA effects (Table 7, 8). Similar types of crosses were also reported for  
738 antioxidant traits in cauliflower [69]. It might be in response to the fact that the GCA of a  
739 parental line and SCA effects of a specific cross is dependent upon the particular lines,  
740 germplasm used in analysis, whereas heterosis is determined in response to mid parent, better  
741 parent or standard check.

## 742 **Cluster analysis, allelic diversity, and genetic structure**

743 The study of morphological and molecular diversity is most vital in selecting desirable parents  
744 for hybrid breeding. The identification of heterotic pools and analyzing existing genetic variation  
745 in CMS lines is the preliminary requisite for efficient use of elite CMS lines in heterosis  
746 breeding. Study of genetic diversity at morphological and molecular level has been regarded as  
747 potential tool in identification of promising parental lines for developing heterotic hybrids in  
748 *Brassica oleracea* [17, 19, 58, 87]. Based upon PCA and HCA of 26 parental CMS lines and DH  
749 testers for 16 phenotypic traits, it was evident that all the parental lines had sufficient genetic  
750 variation. Then 55.1% variation was depicted by first two axes PC1 and PC2, thus PCA was

751 efficient in determining genetic differentiation among parental lines. The PCA and NJ clustering  
752 based on molecular data represent better informative results for correct analysis and to be useful  
753 in crop improvement programme [17]. The PCA analysis and NJ clustering based on 87 SSR,  
754 EST-SSRs loci reaffirm that all the DH testers remained in two different sub-clusters of single  
755 group including two CMS lines Ogu125-8A and Ogu33-1A which showed close affinity with  
756 DH testers. Then CMS line Ogu125-8A with significantly high GCA in desirable direction for  
757 days to 50% CM, GPW, MCW, NCW, HI, TMY could be useful in developing high yielding  
758 early hybrid. The CMS line Ogu33-1A having significant GCA in desirable negative direction  
759 for earliness traits, days to 50% CI and days to 50% CM, could be used for generation of short  
760 duration early hybrids. Thus, the information pertaining to morphological and genetic diversity  
761 along with GCA could be useful in selecting desirable CMS lines as female parent for the  
762 development of cultivars with desirable traits. Similar types of findings have been reported by  
763 Dey et al. [17] and Parkash et al. [58] with respect to CMS lines in *Brassica oleracea*.  
764 Further, we observed high allele frequency of overall 511 alleles through 87 genomic-SSR and  
765 EST-SSRs loci in 26 parental CMS and DH lines with average allelic frequency of 5.87 alleles  
766 per locus. It is quite high as compared to results reported by Parkash et al. [58], who observed  
767 only 58 total alleles with an average of 2 alleles per locus by 29 polymorphic SSRs in CMS lines  
768 of *Brassica oleracea*, and El-Esawi et al. [19], who reported 47 alleles with an average of 3.92  
769 alleles per locus by 12 SSRs in *Brassica oleracea* genotypes. The quite high number of total  
770 alleles and high allelic frequency per locus revealed in the present investigation is quite possible  
771 as we used over all more numbers of genomic-SSR and EST-SSRs (total 350 microsatellite  
772 primers) distributed throughout the *Brassica oleracea* genome ( $n = 9$ , CC,  $2n = 2x = 18$ ), of  
773 which 87 loci depicted clear cut polymorphism. Of 350 microsatellites, > 50% was EST-SSRs

774 primers, and EST-SSRs are derived from transcribed regions of genome and are having highly  
775 conserved sequences among homologous genes. They depicts the allelic diversity within or  
776 adjacent to genes and that might be more informative functionally and have higher transferability  
777 rate to related taxa in contrast to genomic SSRs [75, 80]. Then, we obtained high value of mean  
778 expected heterozygosity ( $H_e$ ), which is 0.68 indicating high genetic diversity in the studied  
779 genotypes as  $H_e$  corresponds to genetic diversity. The PIC in genetic studies is utilized as a  
780 measure of informativeness of a marker locus for linkage analysis [19, 56] and it categorizes  
781 informative markers as highly informative ( $PIC \geq 0.5$ ), reasonably informative ( $0.5 < PIC > 0.25$ )  
782 and slightly informative ( $PIC < 0.25$ ) [19, 56]. In the present study the PIC content of 87  
783 polymorphic loci ranged from 0.24-0.80 (Table 6), which classified all the 87 loci (g-SSR and  
784 EST-SSRs) as slightly informative (1 primer cnu107), reasonably informative (12 primers) and  
785 highly informative markers (74 primers) as per PIC content (Table 6), suggesting their ability in  
786 genetic differentiation of CMS and DH lines of cauliflower under study. The mean PIC content  
787 of 0.63 in present investigation based on 87 g-SSR and EST-SSRs was higher than the mean PIC  
788 of 0.316 observed for 165 cauliflower inbred lines by Zhu et al. [92] and 0.60 as recorded for 57  
789 genotypes of *Brassica oleracea* comprising 51 cultivars of cauliflower by Zhao et al. [93]. The  
790 higher PIC value for most of loci revealed wide genetic diversity in the studied parental CMS  
791 and DH lines. The Bayesian genetic structure analysis based on posterior probability of data for a  
792 given k revealed 4 main sub-clusters of 26 parental CMS and DH lines at  $k = 4$  with minor  
793 admixture. Cluster III mainly included all the DH testers along with two CMS lines Ogu125-8A  
794 and Ogu33-1A. Thus the 20 CMS lines were grouped into four clusters and maximum number of  
795 CMS lines was found in cluster I. These results suggested that DH testers were quite different  
796 genetically as compared to CMS lines. In all the clusters minor admixture was observed from

797 each of clusters among themselves, which indicated the somewhat gene flow among the parental  
798 lines of different groups.

### 799 **Association of genetic distances and combining ability with heterosis**

800 Numerous studies in different crops have been done to utilize the genetic distances in prediction  
801 of heterotic crosses (27, 34, 38, 40, 44, 73], assuming positive correlation of genetic distances  
802 with heterosis [23], but the correlation of GD and heterosis is not absolute and significantly high  
803 level of heterosis can be obtained involving parents with low, intermediate or high genetic  
804 distance between them. Genetic distances based on both phenotypic and genotypic data are  
805 utilized to study the genetic variation among different genotypes or parental inbred lines. In the  
806 present investigation, high level of Euclidean distance (PD: 2.07 to 8.27) based on 16 phenotypic  
807 characters and GD (0.44-0.83) based on 87 genomic-SSR and EST-SSRs loci was reported  
808 among the CMS lines and DH testers of heterotic crosses. This might be due to the fact that CMS  
809 lines and DH testers used as female and male parent of testcross progenies were genetically quite  
810 dissimilar as reported by phenotypic and SSR, EST-SSRs based cluster analysis. The conflicting  
811 reports are available regarding correlations of genetic distances, heterosis and combining ability.  
812 In the present study, no correlation was observed between two distance measurements, based on  
813 morphological data (PD) and molecular data (GD). This is in contrary to the findings of Gupta et  
814 al. [33] who reported significantly positive correlation of GD and PD ( $r = 0.2$ ) at  $P < 0.001$  in  
815 pearl millets. Our results of no correlation between two distance measures might be due the fact  
816 that morphological traits showing continuous variation are largely influenced by environment  
817 and polygenic inheritance, linkage disequilibrium could result such relationship between two  
818 distance matrixes [10, 11, 33, 83]. Both the distance measures displayed no significant  
819 correlation with SCA of all the traits, suggesting genetic distances might not be effective in

820 predicting SCA effects. Our results are in conformity with Su et al. [73] who also reported no  
821 significant association between genetic distances and SCA in chrysanthemum. However, Tian et  
822 al. [78], Laripe et al. [44] reported significant correlation between total GD and SCA for length  
823 of terminal raceme in rapeseed, for grain yield and plant height in maize, respectively. Thus the  
824 association of GD with SCA is complicated. Further, our results suggested that SCA effects had  
825 stronger significant positive correlation with MPH and BPH for all the studied traits (0.52-0.83)  
826 at  $P \leq 0.01$ . These results are in conformity with the findings of Zhang et al. [88], Su et al. [73],  
827 Tian et al. [78] in barley, chrysanthemum and rapeseed, respectively and indicated non-additive  
828 gene effects for heterosis. The GD and PD differed in their ability to predict MPH and BPH for  
829 different traits. Neither GD nor PD displayed any significant correlation with MPH and BPH for  
830 days to 50% CM, and CL. GD also exhibited no significant correlation with heterosis for LL and  
831 CoL. Similarly, PD showed no significant association with heterosis for majority of traits except  
832 LL. However, GD was significantly correlated with MPH and BPH for commercial traits viz.  
833 PH, GPW, NCW, LW, CD and TMY in desirable direction. These results are in line with the  
834 theory proposed by Falconer and Mackay [23]. In general, GD had greater magnitude of PPMCC  
835 than PD with heterosis for all the traits under study. The variability in correlation coefficients  
836 between heterosis for respective traits and genetic distances may reflect allele numbers controlling  
837 the trait expression [34]. Wegary et al. [83] also highlighted the significant importance of GD in  
838 contrast to PD for predicting hybrid performance in maize. Our results are in agreement with the  
839 findings of Wegary et al. [83], who reported significant correlation of GD with heterosis for  
840 grain yield, plant height and ear height, similar of morphological distance with heterosis for  
841 certain traits in quality protein maize. The results obtained are also in line with the findings of  
842 Jagosz [36], who reported significant association of GD (based on RAP and AFLP markers) with

843 heterosis for total and marketable yield in carrot. On the other hand, Tian et al. [78] and Su et al.  
844 [73] reported no significant correlation of PD and GD with MPH and BPH for any traits in  
845 rapeseed, chrysanthemum, respectively. Likewise, results are also in contrary with the findings  
846 of Geleta et al. [30] and Kawamura et al. [40] in pepper and chinese cabbage, respectively,  
847 suggesting no utility of GD in prediction of heterosis, while Krishnamurthy et al. [42] suggested  
848 selection of parents with intermediate divergence based on AFLP markers for getting more  
849 number of heterotic hybrids for yield in chilli using CMS lines. Regarding cole group of  
850 vegetables (*Brassica oleracea*), we only found a single report of describing interrelationships  
851 between genetic distances and heterosis, which is on broccoli (*B. oleracea* var. *italic* L.) by Hale  
852 et al. [34] using DH based population. They observed significantly negative correlation between  
853 total GD (based on SRAP, AFLP, SSR markers) and heterosis for all the traits, suggesting  
854 reduction in heterosis with the increase in genetic distances. Thus, our study is the first  
855 comprehensive report regarding interrelationships between GD (based on SSR, EST-SSRs) and  
856 heterosis for commercial traits in snowball cauliflower, suggesting significant correlation in  
857 desirable direction for respective traits. Hence, based on our results, we recommend the  
858 application of genomic-SSR and EST-SSRs based genetic distances in prediction of heterosis for  
859 yield and commercial traits involving CMS and DH based parental inbred lines in snowball  
860 cauliflower (*Brassica oleracea* var. *botrytis* L.). The non significant or poor correlation between  
861 GD and heterosis for certain traits might be due to lack of linkage between different alleles  
862 responsible for expression of particular trait and molecular marker used for estimating GD,  
863 inadequate coverage of entire genome, epistasis, DNA markers may be from unexpressed region  
864 of genome having no interaction with commercial traits and heterosis [5, 34, 53, 86]. The  
865 molecular marker based GD would be more predictive of heterosis, when there are strong

866 dominance effects among hybrids, high heritability, linkage of molecular markers and QTLs of  
867 traits of interest [5, 34, 53, 86]. Hence, based on our results and previous findings by other  
868 researchers, it is quite evident that significance of genetic distances in prediction of heterosis  
869 inevitably depends upon, methods used to calculate genetic distances, type of molecular markers,  
870 genome coverage, region of genome, crop, breeding system, traits under consideration, type of  
871 germplasm and environmental conditions.

## 872 **Conclusions**

873 In conclusion, our study is the first report on determining heterotic groups based on combining  
874 ability for morphological, yield and commercial traits using *Ogura* cybrid cytoplasm based CMS  
875 lines and DH testers. We also presented the first comprehensive report on predicting the  
876 association of genome wide EST-SSRs based GD and morphological traits based PD with  
877 heterosis, of F<sub>1</sub> hybrids involving CMS and DH parental lines, for commercial traits in snowball  
878 cauliflower (*Brassica oleracea* var. *botrytis*). Analysis of variance of parents and their  
879 testcrosses revealed the presence of sufficient significant genetic variability, enabling the scope  
880 for crop improvement. Significant genetic differentiation was also observed among the parental  
881 CMS and DH lines using morphological and molecular markers. Present investigation also  
882 emphasizes the relevance of both GCA and SCA in the selection of elite parents for the  
883 improvement of yield and commercial traits and predicting appropriate breeding strategies for  
884 the crop genetic improvement, developing high yielding hybrids, synthetics and composites in  
885 cauliflower. Highly significant correlation of SCA with heterosis suggested the role of non-  
886 additive gene effects in heterosis. The findings of our study further suggested that genetic  
887 distances of SSR, EST-SSRs based molecular data can be used as reliable predictor of heterosis  
888 for commercial traits in CMS and DH based heterotic crosses of cauliflower. Although, the



889 contrasting results obtained in different studies previously regarding efficacy of genetic distances  
890 in prediction of heterosis, invites further investigation with a different sets of large number of  
891 molecular markers covering entire genome, and different set of parental germplasm, in multiple  
892 standard environments.

## 893 **Acknowledgements**

894 First author is thankful to Head ICAR-IARI, Regional Station, Katrain, (H.P.) for providing  
895 necessary facilities during research period and ICAR-IARI, New Delhi, during Ph.D. research  
896 programme. We also acknowledge the help of Dr. S. Dash, IASRI in statistical analysis using  
897 SAS software.

## 898 **Compliance with ethical standards**

899 All the authors declare that they have no conflict of interest

## 900 **Author Contributions**

901 **Conceptualization:** Saurabh Singh, S.S. Dey

902 **Data curation:** Saurabh Singh, S.S. Dey, Reeta Bhatia, Kanika Sharma

903 **Formal Analysis:** Saurabh Singh, S.S. Dey

904 **Investigation:** Saurabh Singh, S.S. Dey, Raj Kumar

905 **Resources:** S.S. Dey, Reeta Bhatia, Raj Kumar, T.K. Behera

906 **Software:** Saurabh Singh, S.S. Dey

907 **Supervision:** Raj Kumar

908 **Visualization:** S.S. Dey, T.K. Behera

909 **Writing original draft:** Saurabh Singh

910 **Review and editing:** S.S. Dey

## 911 **References**

- 912       1. Arashida FM, Maluf WR, Carvalho RC. General and specific combining ability in  
913       tropical winter cauliflower. *Hortic Bras.* 2017; 35: 167-173.  
914       <http://dx.doi.org/10.1590/s0102-053620170203>.
- 915       2. Bayer PE, Golicz AA, Tirnaz S, Chan CK, Edwards D, Batley J. Variation in abundance  
916       of predicted resistance genes in the *Brassica oleracea* pangenome. *Plant Biotechnol J.*  
917       2018; <https://doi.org/10.1111/pbi.13015>.
- 918       3. Bansal P, Banga S, Banga SS. Heterosis as investigated in terms of polyploidy and  
919       genetic diversity using designed *Brassica juncea* amphidiploids and its progenitor diploid  
920       species. *PLOS ONE.* 2012; 7: e29607.
- 921       4. Betran FJ, Ribaut JM, Beck D, de Leon DG. Genetic diversity, specific combining  
922       ability, and heterosis in tropical maize under stress and nonstress environments. *Crop Sci.*  
923       2003; 43: 797-806.
- 924       5. Bernardo R. Relationship between single-cross performance and molecular marker  
925       heterozygosity. *Theor Appl Genet.* 1992; 83: 628–634.
- 926       6. Bhatia R, Dey SS, Sharma PC, Kumar R. In vitro maintenance of CMS lines of Indian  
927       cauliflower: an alternative for conventional CMS-based hybrid seed production. *J Hortic*  
928       *Sci Biotechnol.* 2015; 90: 171-179. <https://doi.org/10.1080/14620316.2015.11513169>.
- 929       7. Bhatia R, Dey SS, Sood S, Sharma K, Sharma VK, Parkash C, Kumar R. Optimizing  
930       protocol for efficient microspore embryogenesis and doubled haploid development in  
931       different maturity groups of cauliflower (*Brassica oleracea* var. *botrytis* L.) in India.  
932       *Euphytica.* 2016; 212: 439-454.

- 933       **8.** Bhatia R, Dey SS, Sood S, Sharma K, Parkash C, Kumar R. Efficient microspore  
934       embryogenesis in cauliflower (*Brassica oleracea* var. *botrytis* L.) for development of  
935       plants with different ploidy level and their use in breeding programme. *Sci Hortic.* 2017;  
936       216: 83-92.
- 937       **9.** Bhatia R, Dey SS, Parkash C, Sharma K, Sood S, Kumar R. Modification of important  
938       factors for efficient microspore embryogenesis and doubled haploid production in field  
939       grown white cabbage (*Brassica oleracea* var. *capitata* L.) genotypes in India. *Sci Hortic.*  
940       2018; 233: 178-187.
- 941       **10.** Burstin J, Charcosset A. Relationship between phenotypic and marker distances:  
942       theoretical and experimental investigations. *J Hered.* 1997; 79: 477-483.
- 943       **11.** Camussi A, Ottaviano E, Calinski T, Kaczmarek Z. Genetic distances based on  
944       quantitative traits. *Genetics.* 1985; 111: 945-962.
- 945       **12.** Cress CE. Heterosis of the hybrid related to gene frequency differences between two  
946       populations. *Genetics.* 1966; 53: 269.
- 947       **13.** Dey SS, Sharma SR, Bhatia R, Parkash C, Barwal RN. Superior CMS (*Ogura*) lines with  
948       better combining ability improved yield and maturity in cauliflower (*Brassica oleracea*  
949       var. *botrytis*). *Euphytica.* 2011; 182: 187-197.
- 950       **14.** Dey SS, Bhatia R, Sharma SR, Parkash C, Sureja AK. Effects of chloroplast substituted  
951       *Ogura* male sterile cytoplasm on the performance of cauliflower (*Brassica oleracea* var.  
952       *botrytis* L.) F<sub>1</sub> hybrids. *Sci Hortic.* 2013; 157: 45-51.
- 953       **15.** Dey SS, Singh N, Bhatia R, Parkash C, Chandel C. Genetic combining ability and  
954       heterosis for important vitamins and antioxidant pigments in cauliflower (*Brassica*  
955       *oleracea* var. *botrytis* L.). *Euphytica.* 2014; 195: 169-181.

- 956       **16.** Dey SS, Bhatia R, Parkash C, Sharma S, Dabral M, Mishra V, Bhardwaj I, Sharma K,  
957           Sharma VK, Kumar R. Alteration in important quality traits and antioxidant activities in  
958           *Brassica oleracea* with *Ogura* cybrid cytoplasm. *Plant Breed.* 2017a; 136: 400-409.
- 959       **17.** Dey SS, Bhatia R, Bhardwaj I, Mishra V, Sharma K, Parkash C, Kumar S, Sharma VK,  
960           Kumar R. Molecular-agronomic characterization and genetic study reveals usefulness of  
961           refined *Ogura* cytoplasm based CMS lines in hybrid breeding of cauliflower (*Brassica*  
962           *oleracea* var. *botrytis* L.). *Sci Hortic.* 2017b; 224: 27-36.
- 963       **18.** Earl DA, vonHoldt BM. STRUCTURE HARVESTER: a website and program for  
964           visualizing STRUCTURE output and implementing the Evanno method. *Conservation*  
965           *Genet Resour.* 2012; 4: 359-361. <https://doi.org/10.1007/s12686-011-9548-7>.
- 966       **19.** El-Esawi MA, Germaine K, Bourke P, Malone R. Genetic diversity and population  
967           structure of *Brassica oleracea* germplasm in Ireland using SSR markers. *C R Biol.* 2016;  
968           339: 133-140.
- 969       **20.** Esposito MA, Bermejo C, Gatti I, Guindon MF, Cravero V, Cointry EL. Prediction of  
970           heterotic crosses for yield in *Pisum sativum* L. *Sci Hortic.* 2014; 177: 53-62.
- 971       **21.** Evanno G, Regnaut S, Goude J. Detecting the number of clusters of individuals using the  
972           software STRUCTURE: a simulation study. *Mol Ecol.* 2005; 14: 2611–2620.
- 973       **22.** Evans LM, Tahmasbi R, Jones M, Vrieze SI, Abecasis GR, Das S, Bjelland DW, de  
974           Candia TR, Yang J, Goddard ME, Visscher PM, Keller MC. Narrow-sense heritability  
975           estimation of complex traits using identity-by-descent information. *Heredity.* 2018;  
976           <https://doi.org/10.1038/s41437-018-0067-0>.
- 977       **23.** Falconer DS, Mackay TFC. *Introduction to quantitative genetics*, 4th edn. Longman,  
978           London; 1996.

- 979       **24.** Fasahat P, Rajabi A, Rad MJ, Derera J. Principles and utilization of combining ability in  
980       plant breeding. *Biom Biostat Int J.* 2016; 4: 1–24. [https://doi.org/10.15406/bbij.2016.04.](https://doi.org/10.15406/bbij.2016.04.00085)  
981       00085.
- 982       **25.** Ferrie AMR, Mollers C. Haploids and doubled haploids in *Brassica* spp. for genetic and  
983       genomic research. *Plant Cell Tiss Organ Cult.* 2011; 104: 375-386.
- 984       **26.** Fujimoto R, Uezono K, Ishikura S, Osabe K, Peacock WJ, Dennis ES. Recent research on  
985       the mechanism of heterosis is important for crop and vegetable breeding systems. *Breed*  
986       *Sci.* 2018; 68: 145-158.
- 987       **27.** Fu D, Xiao M, Hayward A, Fu Y, Liu G, Jiang G, Zhang H. Utilization of crop heterosis:  
988       a review. *Euphytica.* 2014; 197: 161-173.
- 989       **28.** Gao W, Baars JJP, Dolstra O, Visser RGF, Sonnenberg ASM. Genetic variation and  
990       combining ability analysis of bruising sensitivity of *Agaricus bisporus*. *PLOS ONE.*  
991       2013; 8: e76826. <https://doi.org/10.1371/journal.pone.0076826>.
- 992       **29.** Garg N, Lal T. Heterosis for growth and curd characters in Indian cauliflower (*Brassica*  
993       *oleracea* var. *botrytis* L.). *Crop Improv.* 2005; 32: 193-199.
- 994       **30.** Geleta LF, Labuschagne MT, Viljoen CD. Relationship between heterosis and genetic  
995       distance based on morphological traits and AFLP markers in pepper. *Plant Breed.* 2004;  
996       123: 467-473.
- 997       **31.** Groszmann M, Greaves IK, Fujimoto R, Peacock WJ, Dennis ES. The role of epigenetics  
998       in hybrid vigour. *Trends Genet.* 2013; 29: 684-690.
- 999       **32.** Groszmann M, Gonzalez-Bayon R, Greaves IK, Wang L, Huen AK, Peacock WJ, Dennis  
1000       ES. Intraspecific *Arabidopsis* hybrids show different patterns of heterosis despite the  
1001       close relatedness of the parental genomes. *Plant Physiol.* 2014; 166(1): 265-80.

- 1002       **33.** Gupta SK, Nepolean T, Shaikh CG, Rai K, Hash CT, Das RR, Rathore A. Phenotypic and  
1003           molecular diversity-based prediction of heterosis in pearl millet (*Pennisetum glaucum* L.  
1004           (R.) Br.). *Crop J.* 2018; 6: 271-281.
- 1005       **34.** Hale AL, Farnham MW, Nzaramba MN, Kimbeng CA. Heterosis for horticultural traits  
1006           in broccoli. *Theor Appl Genet.* 2007; 115: 351-360.
- 1007       **35.** Hasan Y, Briggs W, Matschegewski C, Ordon F, Stützel H, Zetzsche H, Groen  
1008           S, Uptmoor R. Quantitative trait loci controlling leaf appearance and curd initiation of  
1009           cauliflower in relation to temperature. *Theor Appl Genet.* 2016; 129: 1273-1288.
- 1010       **36.** Jagosz B. The relationship between heterosis and genetic distances based on RAPD and  
1011           AFLP markers in carrot. *Plant Breed.* 2011; 130: 574-579.
- 1012       **37.** Johnson HW, Robinson HF, Comstock RE. Estimation of genetic and  
1013           environmental variability in soybeans. *Agron J.* 1955; 47: 314-318.
- 1014       **38.** Kaushik P, Plazas M, Prohens J, Vilanova S, Gramazio P. Diallel genetic analysis for  
1015           multiple traits in eggplant and assessment of genetic distances for predicting hybrids  
1016           performance. *PLOS ONE.* 2018; 13: e0199943.
- 1017       **39.** Kalinowski ST, Taper ML, Marshall TC. Revising how the computer program CERVUS  
1018           accommodates genotyping error increases success in paternity assignment. *Mol Ecol.*  
1019           2007; 16: 1099-1106. <http://dx.doi.org/10.1111/j.1365-294x.2007.03089.x>.
- 1020       **40.** Kawamura K, Kawanabe T, Shimizu M, Nagano AJ, Saeki N, Okazaki K, Kaji M,  
1021           Dennis ES, Osabe K, Fujimoto R. Genetic distance of inbred lines of Chinese cabbage  
1022           and its relationship to heterosis. *Plant Gene.* 2016; 5: 1-7.
- 1023       **41.** Kempthorne O. An introduction to genetic statistics. John Wiley & Sons, Inc., New York;  
1024           1957.

- 1025       **42.** Krishnamurthy SL, Rao AM, Reddy KM, Ramesh S, Hittalmani S, Rao MG. Limits of  
1026           parental divergence for the occurrence of heterosis through morphological and AFLP  
1027           marker in chilli (*Capsicum annuum* L.).Curr Sci. 2013; 104: 738-746.
- 1028       **43.** Lariepe A, Mangin B, Jasson S, Combes V, Dumas F, Jamin P, Lariagon C, Jolivot D,  
1029           Madur D, Fievet J, Gallais A, Dubreuil P, Charcosset A, Moreau L. The genetic basis of  
1030           heterosis: multiparental quantitative trait loci mapping reveals contrasted levels of  
1031           apparent overdominance among traits of agronomical interest in Maize (*Zea mays* L.).  
1032           Genetics. 2012; 190: 795-811.
- 1033       **44.** Lariepe A, Moreau L, Laborde J, Bauland C, Mezmouk S, Decousset L, Mary-Huard T,  
1034           Fievet JB, Gallais A, Dubreuil P, Charcosset A. General and specific combining abilities  
1035           in a maize (*Zea mays* L.) test-cross hybrid panel: relative importance of population  
1036           structure and genetic divergence between parents. Theor Appl Genet. 2017; 130: 403-  
1037           417.
- 1038       **45.** Lauss K, Wardenaar R, Oka R, van Hulten MHA, Guryev E, Keurentjes JJB, Stam M,  
1039           Johannes F. Parental DNA methylation states are associated with heterosis in epigenetic  
1040           hybrids. Plant Physiol. 2018; 176: 1627-1645.
- 1041       **46.** Lin YR, Lee JY, Tseng MC, Lee CY, Shen CH, Wang CS, Liou CC, Shuang LS,  
1042           Paterson AH, Hwu KK. Subtropical adaptation of a temperate plant (*Brassica oleracea*  
1043           var. *italica*) utilizes non-vernalization-responsive QTLs. Sci Rep. 2018; 8: 13609.  
1044           <https://doi.org/10.1038/s41598-018-31987-1>.
- 1045       **47.** Li H, Chen X, Yang Y, Xu J, Gu J, Fu J, Qian X, Zhang S, Wu J, Liu K. Development  
1046           and genetic mapping of microsatellite markers from whole genome shotgun sequences in  
1047           *Brassica oleracea*. Mol Breed. 2011; 28: 585-596.

- 1048       **48.** Li H, Yuan J, Wu M, Han Z, Li L, Jiang H, Jia Y, Han X, Liu M, Sun D, Chen C, Song  
1049           W, Wang C. Transcriptome and DNA methylome reveal insights into yield heterosis in  
1050           the curds of broccoli (*Brassica oleracea* L. var. *italica*). BMC Plant Biol. 2018; 18: 168.  
1051           <https://doi.org/10.1186/s12870-018-1384-4>.
- 1052       **49.** Lippman ZB, Zamir D. Heterosis: revisiting the magic. Trends Genet. 2007; 23: 60-66.
- 1053       **50.** Liu X, Han F, Kong C, Fang Z, Yang L, Zhang Y, Zhuang M, Liu Y, Li Z, Lv H. Rapid  
1054           introgression of fusarium wilt resistance gene into the elite cabbage line through the  
1055           combined application of a microspore culture, genome background analysis, and disease  
1056           resistance-specific marker assisted foreground selection. Front Plant Sci. 2017; 8: 354.
- 1057       **51.** Lv H, Wang Q, Liu X, Han F, Fang Z, Yang L, Zhuang M, Liu Y, Li Z, Zhang Y. Whole-  
1058           genome mapping reveals novel QTL cluster associated with main agronomic traits of  
1059           cabbage (*Brassica oleracea* var. *capitata* L.). Front Plant Sci. 2016; 7: 989.  
1060           <https://doi.org/10.3389/fpls.2016.00989>.
- 1061       **52.** Maggioni L, von Bothmer R, Poulsen G, Lipman E. Domestication, diversity and use of  
1062           *Brassica oleracea* L., based on ancient Greek and Latin texts. Genet Resour Crop Evol.  
1063           2018; 65: 137-159.
- 1064       **53.** Makumbi D, Betran JF, Banziger M, Ribaut JM. Combining ability, heterosis and genetic  
1065           diversity in tropical maize (*Zea mays* L.) under stress and non-stress conditions.  
1066           Euphytica. 2011; 180: 143-162.
- 1067       **54.** Melchinger AE, Piepho HP, Utz HF, Muminovic J, Wegenast T, Torjek O, Altmann A,  
1068           Kusterer B. Genetic basis of heterosis for growth-related traits in Arabidopsis  
1069           investigated by testcross progenies of near-isogenic lines reveals a significant role of  
1070           epistasis. Genetics. 2007; 177: 1827-1837.



- 1071 **55.** Meyer RC, Torjek O, Becher M, Altmann T. Heterosis of biomass production in  
1072 Arabidopsis. Establishment during early development. *Plant Physiol.* 2004; 134: 1813-  
1073 1823.
- 1074 **56.** Moges AD, Admassu B, Belew D, Yesuf M, Njuguna J, Kyalo M, Ghimire SR.  
1075 Development of microsatellite markers and analysis of genetic diversity and population  
1076 structure of *Colletotrichum gloeosporioides* from Ethiopia. *PLOS ONE.* 2016; 11:  
1077 e0151257. <https://doi.org/10.1371/journal.pone.0151257>.
- 1078 **57.** Murray MG, Thompson WF. Rapid isolation of high molecular weight plant DNA.  
1079 *Nucleic Acid Res.* 1980; 8: 4321.
- 1080 **58.** Parkash C, Kumar S, Singh R, Kumar A, Kumar S, Dey SS, Bhatia R, Kumar R. ‘Ogura’-  
1081 based ‘CMS’ lines with different nuclear backgrounds of cabbage revealed substantial  
1082 diversity at morphological and molecular levels. *3Biotech.* 2018; 8: 27.  
1083 <https://doi.org/10.1007/s13205-017-1047-4>
- 1084 **59.** Perrier X, Jacquemoud-Collet JP. DARwin software. 2006; <http://darwin.cirad.fr/>
- 1085 **60.** Pritchard J, Stephens M, Donnelly P. Inference of population structure using multilocus  
1086 genotype data. *Genetics.* 2000; 155: 945–959.
- 1087 **61.** Robinson HS. Quantitative genetics in relation to breeding on the central of mendalism.  
1088 *Indian J Genet.* 1966; 26: 171-187.
- 1089 **62.** Rosen A, Hasan Y, Briggs W, Uptmoor R. Genome-based prediction of time to curd  
1090 induction in cauliflower. *Front Plant Sci.* 2018; 9: 78.
- 1091 **63.** RStudio Team. RStudio: Integrated Development for R. RStudio, Inc., Boston, MA,  
1092 2015; URL: <http://www.rstudio.com/>.

- 1093       **64.** Samec D, Urlic B, Salopek-Sondi B. Kale (*Brassica oleracea* var. *acephala*) as a  
1094           superfood: Review of the scientific evidence behind the statement. *Crit Rev Food Sci*  
1095           *Nutr.* 2018; 20: 1-12. [https://doi.org/ 0.1080/10408398.2018](https://doi.org/10.1080/10408398.2018).
- 1096       **65.** SAS Institute Inc. SAS Online Doc, Version 9.4. Cary, NC; 2013.
- 1097       **66.** Sehgal N, Singh S. Progress on deciphering the molecular aspects of cell-to-cell  
1098           communication in *Brassica* self-incompatibility response. *3Biotech.* 2018; 8: 347.  
1099           <https://doi.org/10.1007/s13205-018-1372-2>.
- 1100       **67.** Sharma SR. Cabbage. In: Sirohi PS (ed) Vegetable crop production. Division of  
1101           Vegetable Science, IARI, New Delhi, 2003.
- 1102       **68.** Singh S, Vidyasagar. Effect of common salt (NaCl) sprays to overcome the self-  
1103           incompatibility in the S-allele lines of *Brassica oleracea* var. *capitata* L. *SABRAO J*  
1104           *Breed Genet.* 2012; 44: 339-348.
- 1105       **69.** Singh S, Bhatia R, Kumar R, Sharma K, Dash S, Dey SS. Cytoplasmic male sterile and  
1106           doubled haploid lines with desirable combining ability enhances the concentration of  
1107           important antioxidant attributes in *Brassica oleracea*. *Euphytica.* 2018a; 214: 207.  
1108           <https://doi.org/10.1007/s10681-018-2291-3>.
- 1109       **70.** Singh S, Dey SS, Bhatia R, Batley J, Kumar R. Molecular breeding for resistance to  
1110           black rot [*Xanthomonas campestris* pv. *campestris* (Pammel) Dowson] in *Brassicac*:  
1111           recent advances. *Euphytica.* 2018b; 214: 196. [https://doi.org/10.1007/s10681-018-2275-](https://doi.org/10.1007/s10681-018-2275-3)  
1112           3.
- 1113       **71.** Sotelo T, Cartea ME, Velasco P, Soengas P. Identification of antioxidant-capacity related  
1114           QTLs in *Brassica oleracea*. *PLOS ONE.* 2014; 9: e107290.

- 1115       **72.** Su Y, Liu Y, Li Z, Fang Z, Yang L, Zhuang M, Zhang Y. QTL analysis of head splitting  
1116            resistance in cabbage (*Brassica oleracea* L. var. *capitata*) using SSR and InDel markers  
1117            based on whole genome re-sequencing. PLOS ONE. 2015; 10: e0138073.  
1118            <https://doi.org/10.1371/journal.pone.0138073>.
- 1119       **73.** Su J, Zhang F, Yang X, Feng Y, Yang X, Wu Y, Guan Z, Fang W, Chen F. Combining  
1120            ability, heterosis, genetic distance and their intercorrelations for waterlogging tolerance  
1121            traits in chrysanthemum. Euphytica. 2017; 213: 42.
- 1122       **74.** Tams SH, Bauer E, Oettler G, Melchinger AE, Schon CC. Prospects for hybrid breeding  
1123            in winter triticale: II. Relationship between parental genetic distance and specific  
1124            combining ability. Plant Breed. 2006; 125: 331-336.
- 1125       **75.** Taheri S, Abdullah TL, Yusop MR, Hanafi MM, Sahebi M, Azizi P, Shamschiri RR.  
1126            Mining and development of novel SSR markers using next generation sequencing (NGS)  
1127            data in plants. Molecules. 2018; 23: 399. <https://doi.org/10.3390/molecules23020399>.
- 1128       **76.** Thakur AJ, Singh KH, Singh L, Nanjundan J, Khan YJ, Singh D. SSR marker variations  
1129            in Brassica species provide insight into the origin and evolution of *Brassica*  
1130            amphidiploids. Hereditas. 2018; 155: 6.
- 1131       **77.** Thakur P, Vidyasagar, Singh S. Evaluation of cytoplasmic male sterile (CMS) progenies  
1132            and maintainer lines for yield and horticultural traits in cabbage (*Brassica oleracea* var.  
1133            *capitata* L.). SABRAO J Breed Genet. 2015; 47: 29-39.
- 1134       **78.** Tian HY, Channa SA, Hu SW. Relationships between genetic distance, combining ability  
1135            and heterosis in rapeseed (*Brassica napus* L.). Euphytica. 2017; 213: 1.

- 1136       **79.** Teklewold A, Becker HC. Comparison of phenotypic and molecular distances to predict  
1137           heterosis and F<sub>1</sub> performance in Ethiopian mustard (*Brassica carinata* A. Braun.). 2006;  
1138           112 (4): 752-9. <https://doi.org/10.1007/s00122-005-0180-3>.
- 1139       **80.** Varshney RK, Graner A, Sorrells MW. Genic microsatellite markers in plants: features  
1140           and applications. Trends Biotechnol. 2005; 23: 48-55.
- 1141       **81.** Verma VK, Kalia P. Combining ability analysis and its relationship with gene action and  
1142           heterosis in early maturity cauliflower. Proc Natl Acad Sci, India, Sect B Biol Sci. 2017;  
1143           87: 877-884.
- 1144       **82.** Wang W, Huang S, Liu Y, Fang Z, Yang L, Hua W, Yuan S, Liu S, Sun J, Zhuang M,  
1145           Zhang Y, Zeng A. Construction and analysis of a high-density genetic linkage map in  
1146           cabbage (*Brassica oleracea* L. var. *capitata*). BMC Genomics. 2012; 13: 523.  
1147           <https://doi.org/10.1186/1471-2164-13-523>.
- 1148       **83.** Wegary D, Vivek B, Labuschagne M. Association of parental genetic distance with  
1149           heterosis and specific combining ability in quality protein maize. Euphytica. 2013; 191:  
1150           205-216.
- 1151       **84.** Wei T, Simko VR. Package “corrplot”: Visualization of a Correlation Matrix (Version  
1152           0.84). 2017; <https://github.com/taiyun/corrplot>.
- 1153       **85.** Xie F, Zha J, Tang H, Xu Y, Liu X, Wan Z. Combining ability and heterosis analysis for  
1154           mineral elements by using cytoplasmic male-sterile systems in non-heading Chinese  
1155           cabbage (*Brassica rapa*). Crop Pasture Sci. 2018; 69: 296-302.
- 1156       **86.** Yu CY, Hu SW, Zhao HX, Guo AG, Sun GL. Genetic distances revealed by  
1157           morphological characters, isozymes, proteins and RAPD markers and their relationships

- 1158 with hybrid performance in oilseed rape (*Brassica napus* L.). Theor Appl Genet. 2005;  
1159 110: 511–518.
- 1160 **87.** Yousef EAA, Muller T, Borner A, Schmid KJ. Comparative analysis of genetic diversity  
1161 and differentiation of cauliflower (*Brassica oleracea* var. *botrytis*) accessions from two  
1162 *ex situ* gene banks. PLOS ONE. 2018; 13: e0192062. [https://](https://doi.org/10.1371/journal.pone.0192062)  
1163 [doi.org/10.1371/journal.pone.0192062](https://doi.org/10.1371/journal.pone.0192062).
- 1164 **88.** Zhang X, Lv L, Lv C, Guo B, Xu R. Combining ability of different agronomic traits and  
1165 yield components in hybrid barley. PLOS ONE. 2015; 10: e0126828.  
1166 <https://doi.org/10.1371/journal.pone.0126828>.
- 1167 **89.** Zhang X, Su Y, Liu Y, Fang Z, Yang L, Zhuang M, Zhang Y, Li Z, Lv H. Genetic  
1168 analysis and QTL mapping of traits related to head shape in cabbage (*Brassica oleracea*  
1169 var. *capitata* L.). Sci Hortic. 2016; 207: 82-88.
- 1170 **90.** Zhao Z, Gu H, Sheng X, Yu H, Wang J, Huang L, Wang D. Genome-wide single-  
1171 nucleotide polymorphisms discovery and high-density genetic map construction in  
1172 cauliflower using specific-locus amplified fragment sequencing. Front Plant Sci. 2016; 7:  
1173 334.
- 1174 **91.** Singh S, Singh R, Thakur P, Kumar R. Phytochemicals, functionality and breeding for  
1175 enrichment of cole vegetables (*Brassica oleracea* L.). In: Petropoulos SA, Ferreira ICFR,  
1176 Barros L, editors. Phytochemicals in vegetables: a valuable source of bioactive  
1177 compounds. Bentham Science Publishers, UAE. 2018. Pp. 256-295.
- 1178 **92.** Zhu S, Zhang X, Liu Q, Luo T, Tang Z, Zhou Y. The genetic diversity and relationships  
1179 of cauliflower (*Brassica oleracea* var. *botrytis*) inbred lines assessed by using SSR  
1180 markers. PLOS ONE. 2018; 13: e0208551. <https://doi.org/10.1371/journal.pone.0208551>

1181       **93.** Zhao Z, Gu H, Sheng X, Yu H, Wang J, Zhao J, et al. Genetic diversity and relationships  
1182           among loose-curd cauliflower and related varieties as revealed by microsatellite markers.  
1183           Sci Hortic. 2014; 166: 105–110.

1184

## 1185   **Supporting Information**

1186   **S1 Table. List of 87 polymorphic genomic-SSR and EST-SSRs out of**  
1187   **350 microsatellite markers used for molecular diversity analysis.**

1188   **S2 Table. Estimates of SCA effects of 120 test cross progenies for**  
1189   **yield and horticultural traits.**

1190   **S3 Table. Characterization of parental CMS and DH lines including**  
1191   **commercial checks for 16 agronomic traits.**

1192   **S4 Table. Estimates of phenotypic distance (PD), based on 16**  
1193   **phenotypic traits and genetic distance (GD), based on g-SSR, EST-**  
1194   **SSRs molecular data, between parental lines and testers.**

1195

1196

1197

1198

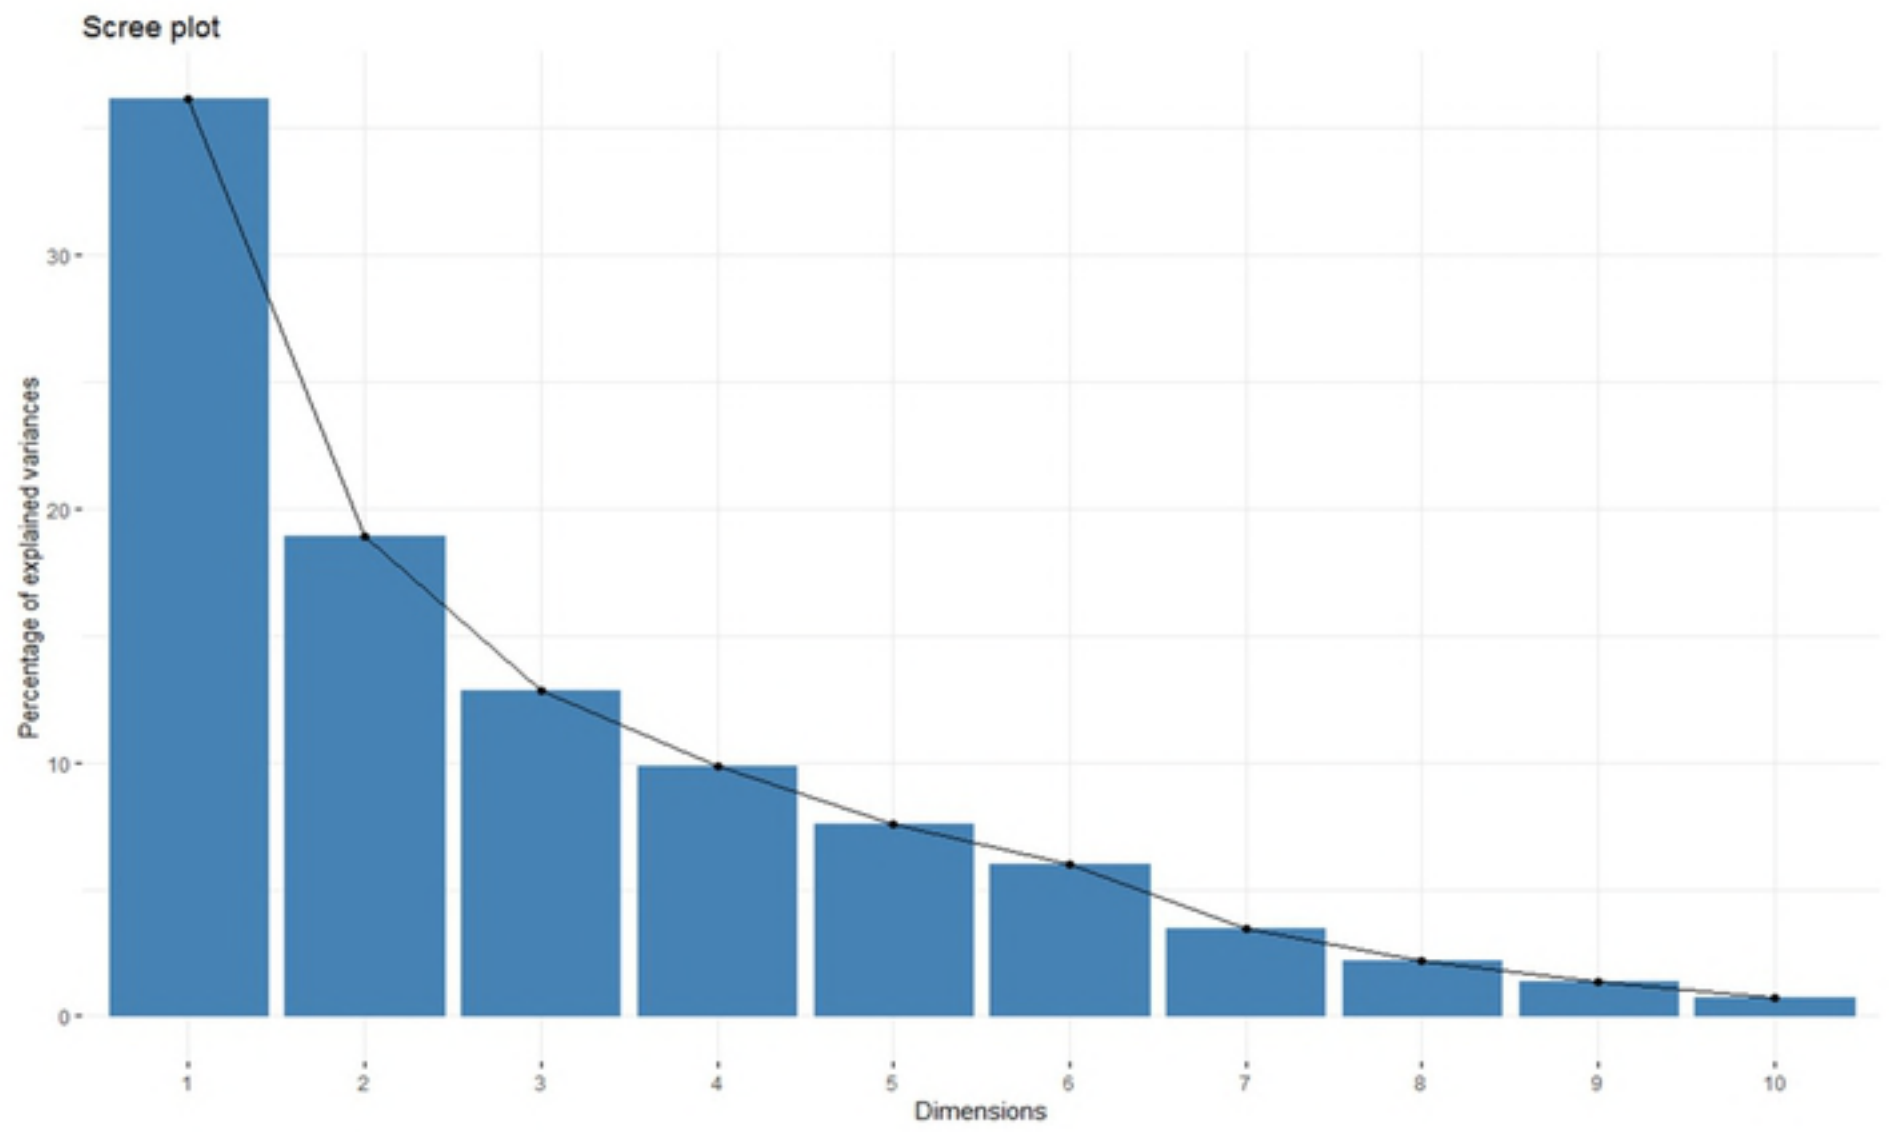

Figure

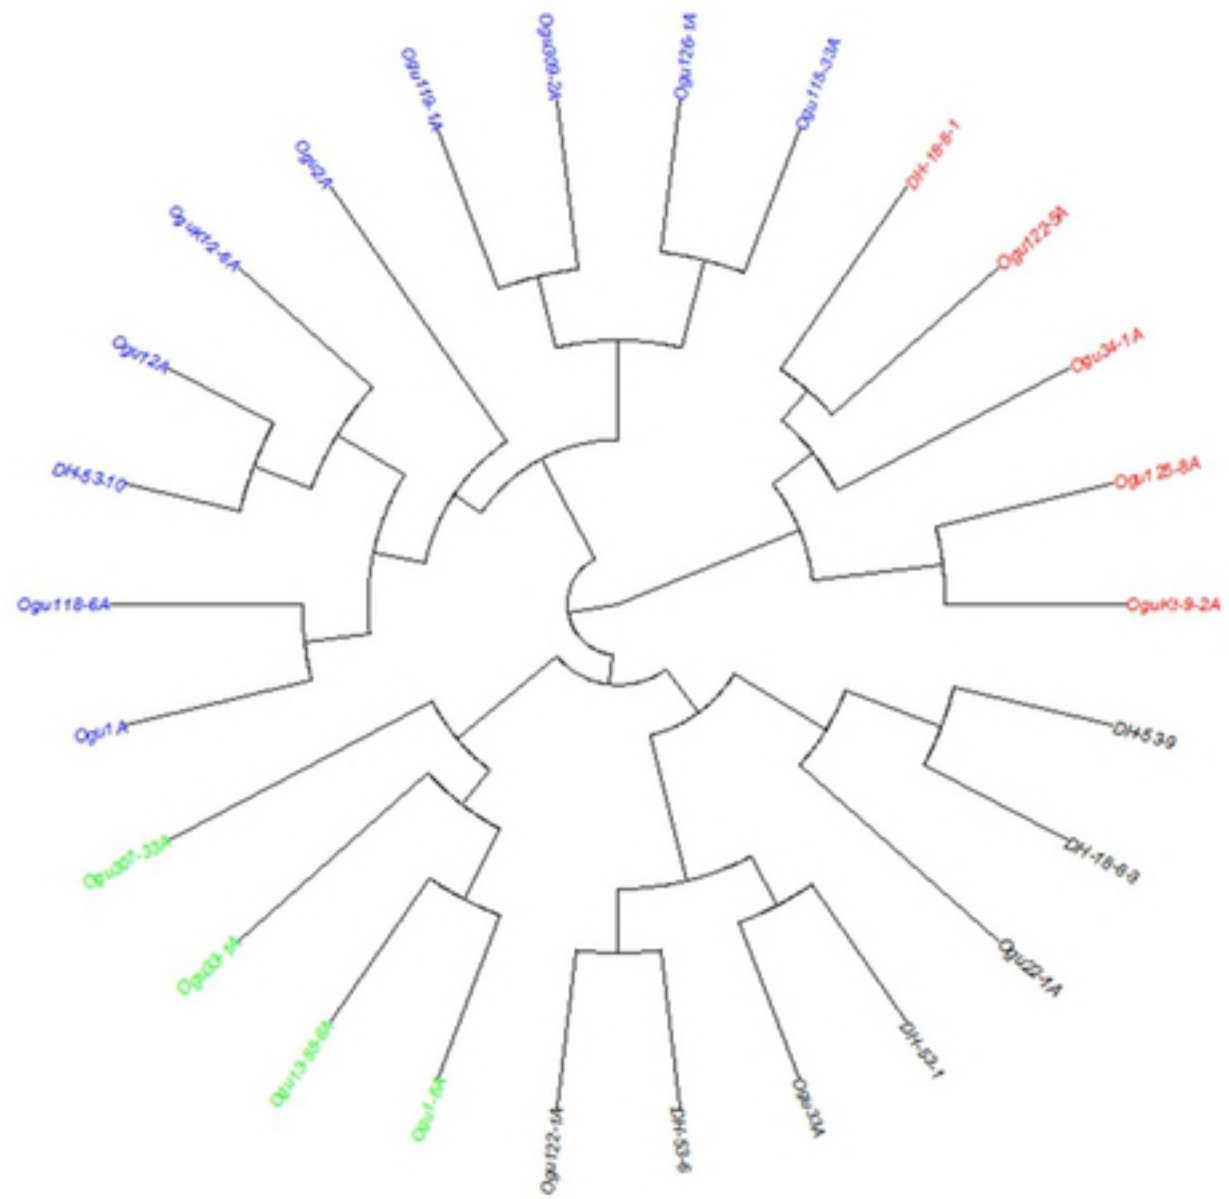

Figure



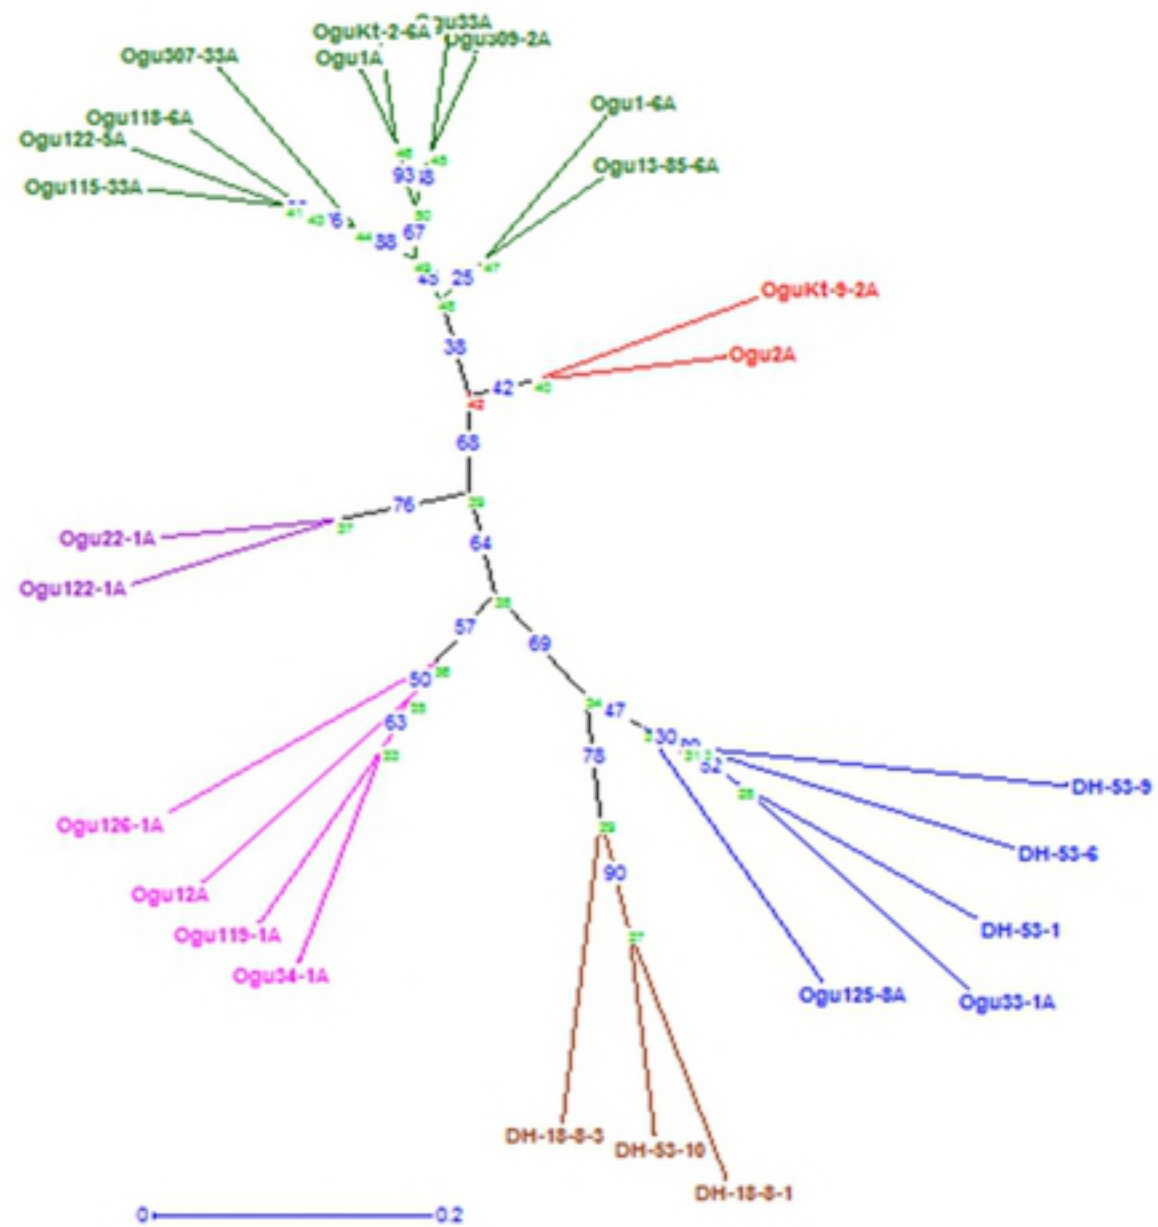

Figure

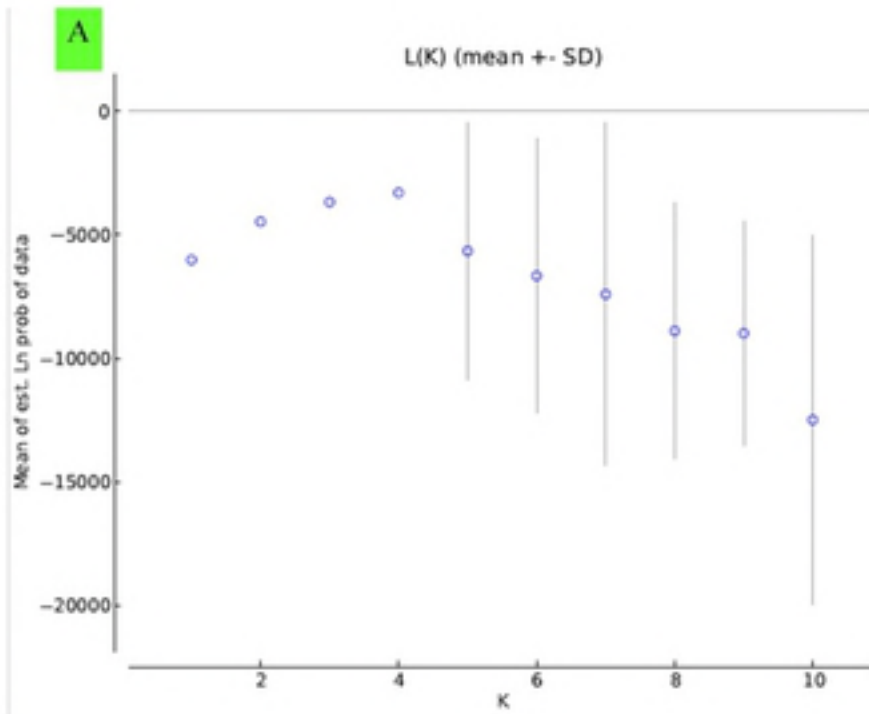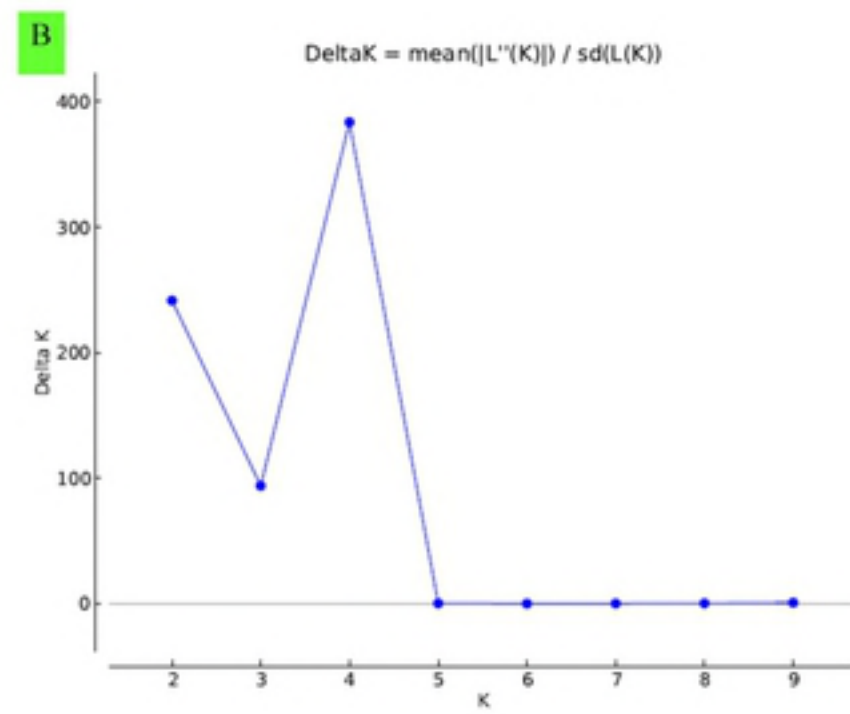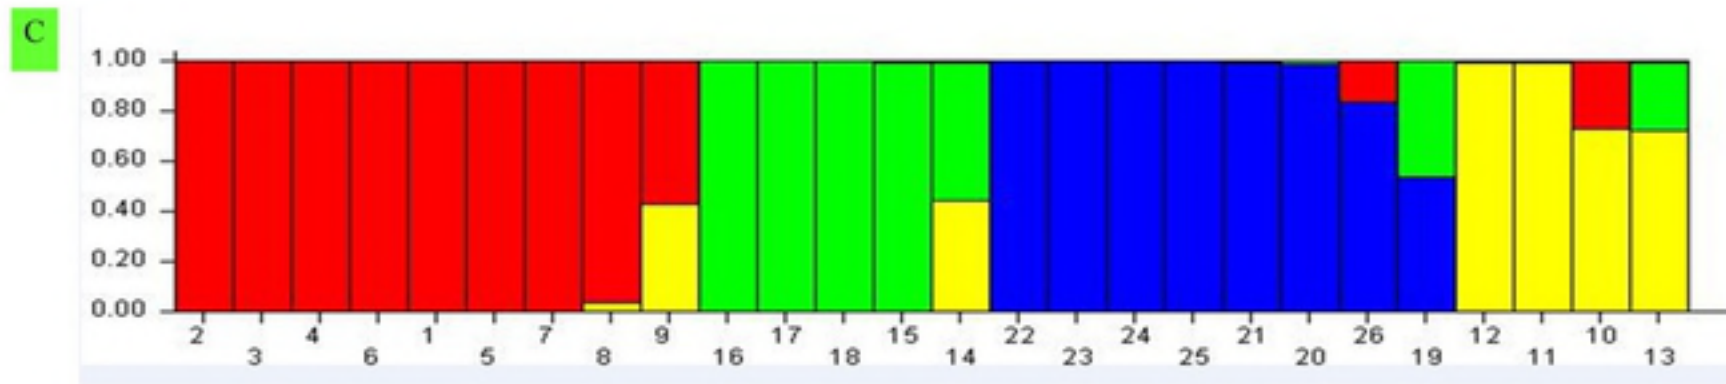

Figure

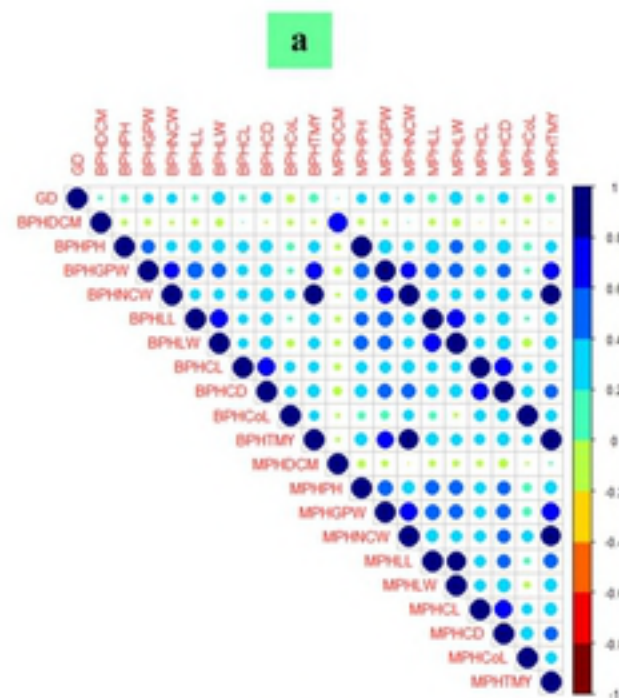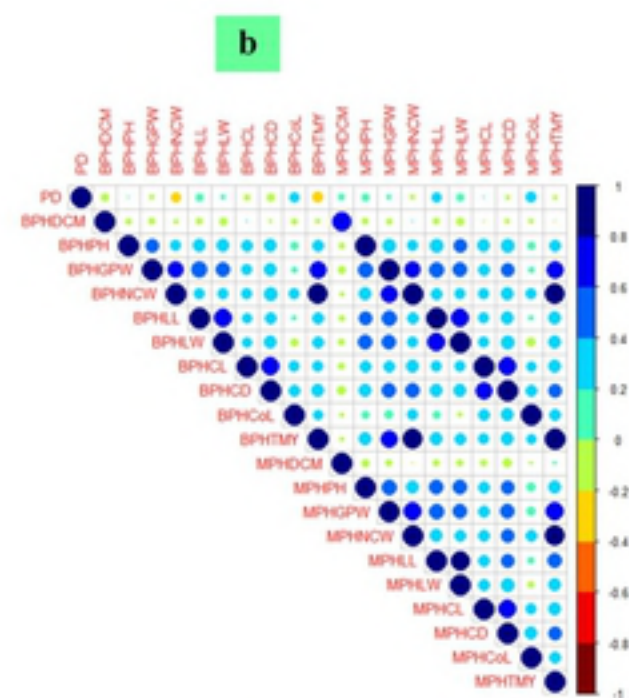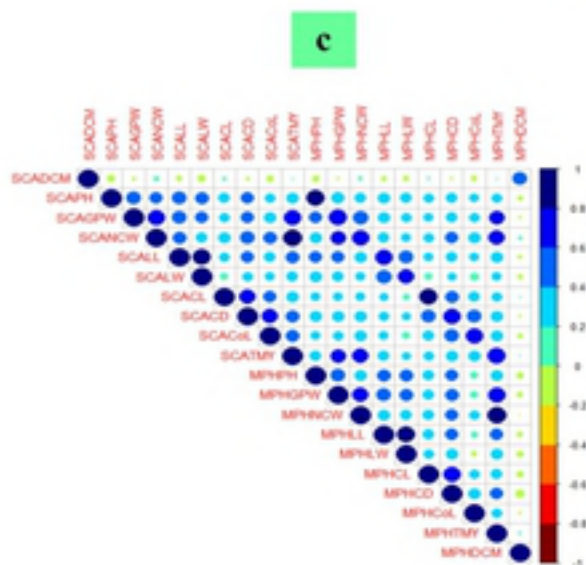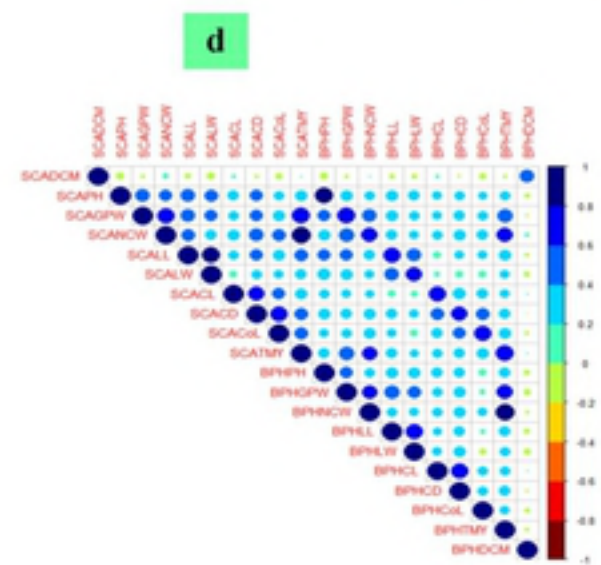

Figure

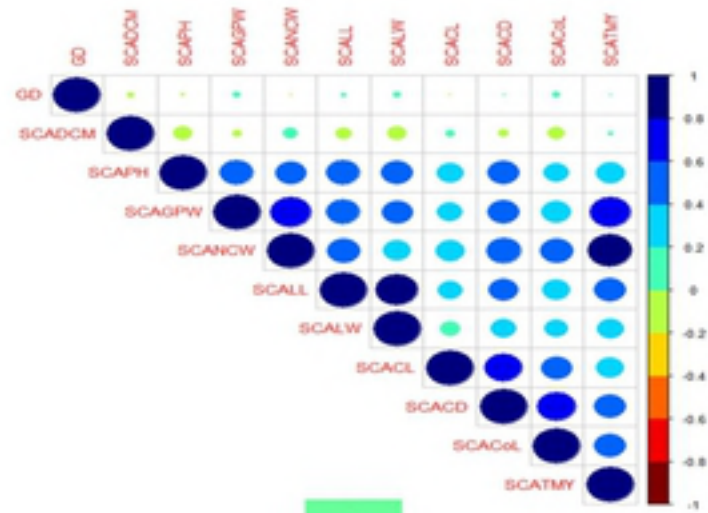

**e**

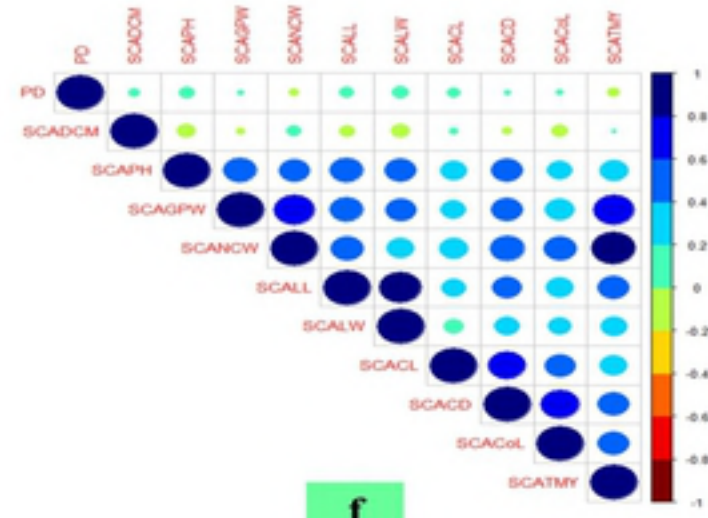

**f**

Figure

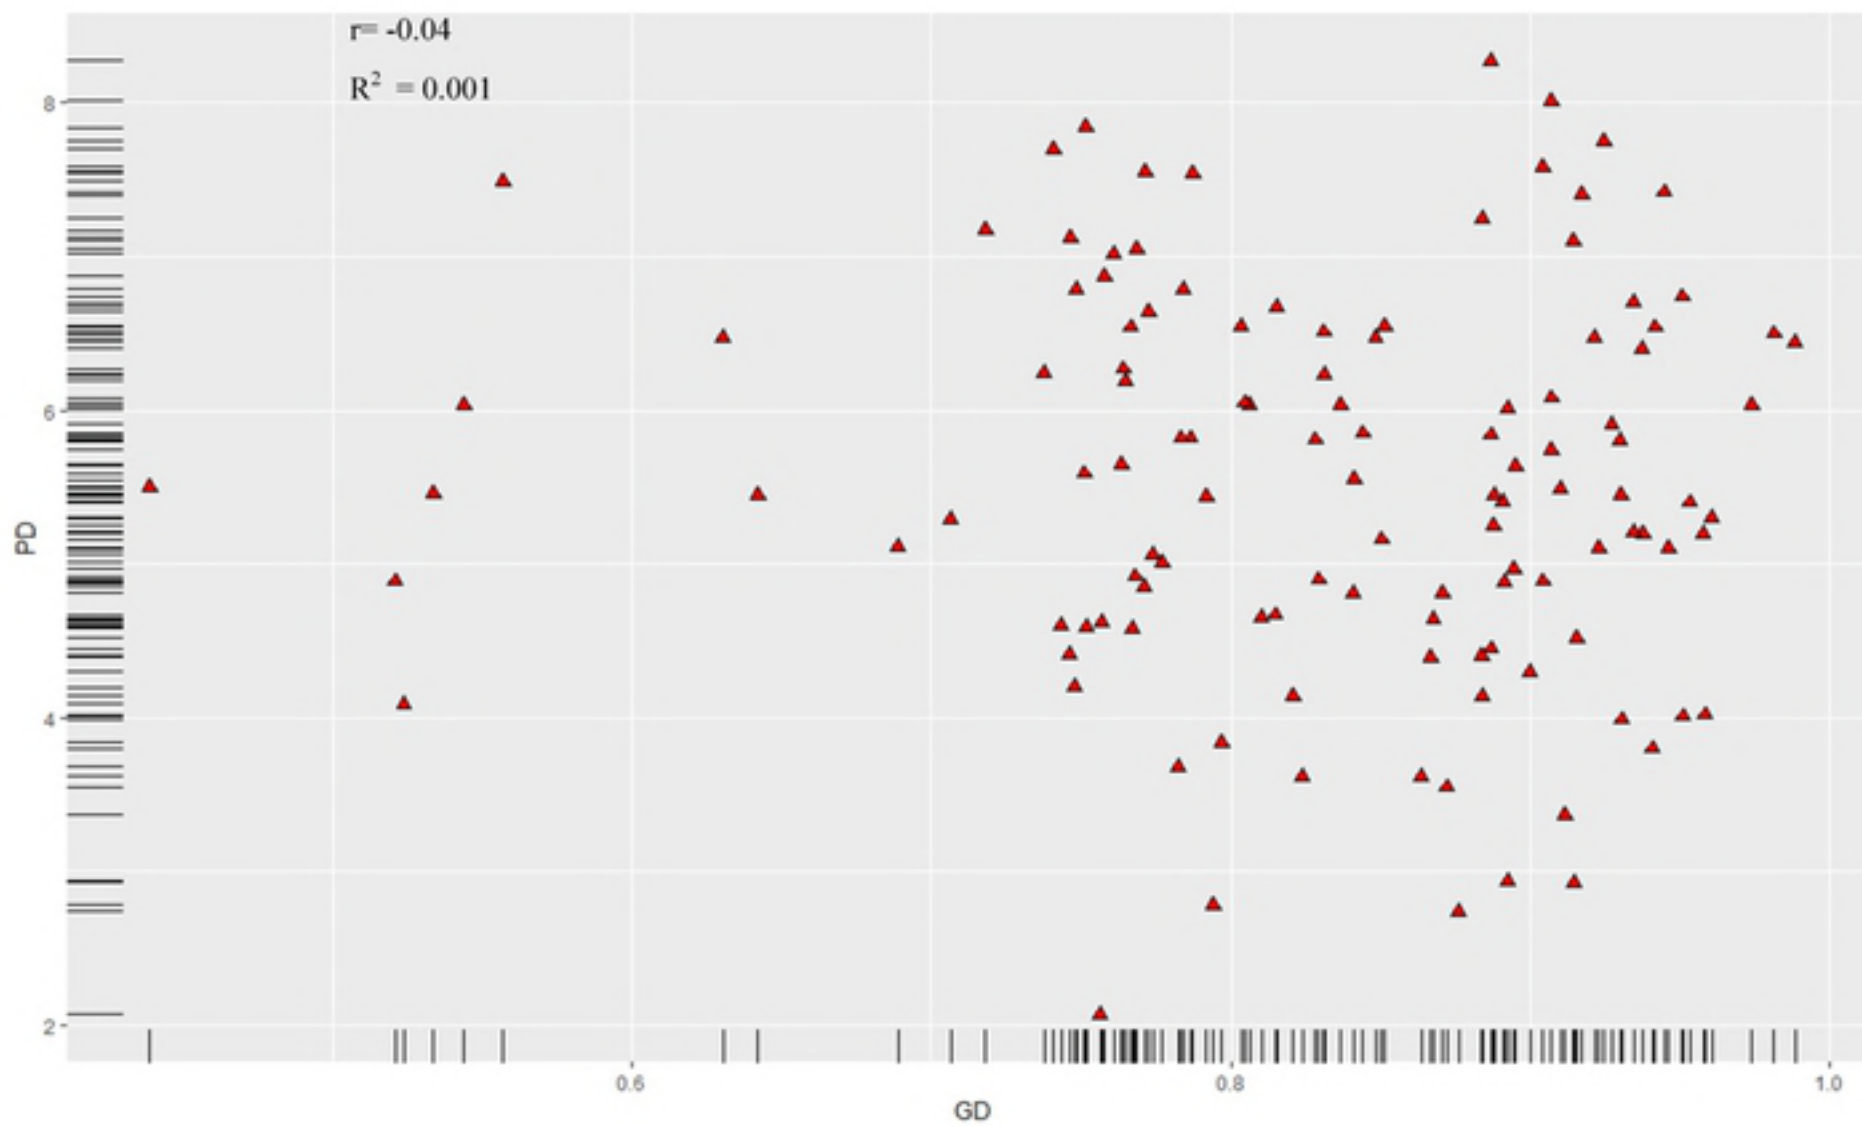

Figure
